The *Ruminococcus bromii* amylosome protein Sas6 binds single and double helical  $\alpha$ -glucan structures in starch.

Amanda L. Photenhauer<sup>1</sup>, Filipe M. Cerqueira<sup>1</sup>, Rosendo Villafuerte-Vega<sup>2</sup>, Krista M. Armbruster<sup>1</sup>, Filip Mareček<sup>3</sup>, Tiantian Chen<sup>4</sup>, Zdzisław Wawrzak<sup>5</sup>, Jesse B. Hopkins<sup>6</sup>, Craig W. Vander Kooi<sup>4</sup>, Štefan Janeček<sup>3</sup>, Brandon T. Ruotolo<sup>2</sup>, Nicole M. Koropatkin<sup>1\*</sup>

<sup>1</sup> Department of Microbiology & Immunology, University of Michigan Medical School, Ann Arbor, MI 48109.

<sup>2</sup> Department of Chemistry, University of Michigan, Ann Arbor, MI 48109.

<sup>3</sup> Laboratory of Protein Evolution, Institute of Molecular Biology, Slovak Academy of Sciences, Bratislava, Slovakia

<sup>4</sup> Department of Biochemistry and Molecular Biology, University of Florida, Gainesville, FL

<sup>5</sup> Northwestern Synchrotron Research Center-LS-CAT, Northwestern University, Argonne, Illinois 60439.

<sup>6</sup> Biophysics Collaborative Access Team, Illinois Institute of Technology, Advanced Photon Source, Argonne National Laboratory, Lemont, Illinois, USA.

\*To whom correspondence should be addressed: [nkoropat@umich.edu](mailto:nkoropat@umich.edu)

Running title: Structure of *Ruminococcus bromii* Sas6

Keywords: starch, CBM74, CBM26, *Ruminococcus bromii*, microbiome

## Abstract

Resistant starch is a prebiotic with breakdown by gut bacteria requiring the action of specialized amylases and starch-binding proteins. The human gut symbiont *Ruminococcus bromii* expresses granular starch-binding protein Sas6 (Starch Adherence System member 6) that consists of two starch-specific carbohydrate binding modules from family 26 (RbCBM26) and family 74 (RbCBM74). Here we present the crystal structures of Sas6 and RbCBM74 with a double helical dimer of maltodecaose bound along an extended surface groove. Binding data combined with native mass spectrometry suggest that RbCBM26 binds short maltooligosaccharides while RbCBM74 can bind single and double helical  $\alpha$ -glucans. Our results support a model by which RbCBM74 and RbCBM26 bind neighboring  $\alpha$ -glucan chains at the granule surface. CBM74s are conserved among starch granule-degrading bacteria and our work provides molecular insight into how this structure is accommodated by select gut species.

# Introduction

The gut microbiota, the consortium of microbes that resides in the human gastrointestinal tract, influences many aspects of host physiology including digestive health [1]. The composition of the gut microbiota is modulated by the human diet [2-4]. After host nutrient absorption in the small intestine, indigestible dietary fiber transits the large intestine and becomes food for gut microbes [3]. Bacterial fermentation of dietary carbohydrates produces beneficial short chain fatty acids including butyrate, a primary carbon source for colonocytes that also has systemic anti-inflammatory and anti-tumorigenic properties [3, 5].

Resistant starch is a prebiotic fiber that tends to increase butyrate in the large intestine [6]. Starch is a glucose polymer composed of branched, soluble amylopectin and coiled insoluble amylose [7, 8]. Breakdown of starch starts with human salivary and pancreatic amylases which release maltooligosaccharides for absorption in the small intestine [9]. However, a portion of starch is indigestible by human amylases and is termed resistant starch (RS) [9]. Raw, uncooked starch granules are resistant to digestion in the upper gastrointestinal tract due to the tight packing of constituent amylose and amylopectin into semi-crystalline, insoluble granules [7]. This type of resistant starch, called RS2, becomes food for gut bacteria that can adhere to and deconstruct granules, releasing glucose and maltooligosaccharides that cross-feed other organisms [9].

Human gut bacteria that degrade RS2 *in vitro* include *Bifidobacterium adolescentis* and *Ruminococcus bromii* [10-14]. *R. bromii* is a Gram-positive anaerobe that increases in relative abundance in the gut upon host consumption of resistant potato or corn starch [10, 15, 16]. *R. bromii* is a keystone species for RS2 degradation because it cross-feeds butyrate-producing bacteria [10]. *R. bromii* synthesizes multi-protein starch-degrading complexes called amylosomes via protein-protein interactions between dockerin and complementary cohesin domains [17-19]. As many as 32 *R. bromii* proteins have predicted cohesin or dockerin domains including amylases, pullulanases, starch-binding proteins, and proteins of unknown function [17, 20]. Many

have carbohydrate-binding modules (CBMs) that presumably aid in binding starch and tether the bacteria to its food source [21].

CBMs are classified by amino acid sequence into numbered families and include members that bind only soluble starch and some that also bind granular starch [21, 22]. One such family is CBM74 which was discovered as a discrete domain (*MaCBM74*) of a multimodular amylase from the potato starch-degrading bacterium, *Microbacterium aurum* [22]. *MaCBM74* binds amylose and amylopectin as well as raw wheat, corn, and potato starch granules [22]. The CBM74 family is unique as it is ~300 amino acids, two to three times larger than most starch-binding CBMs [21]. CBM74 domains are typically found in multimodular enzymes that include a glycoside hydrolase family 13 (GH13) domain for hydrolyzing starch and are flanked by a starch-binding CBM from family 25 or 26 (CBM25 or CBM26) [21, 22]. Most CBM74 family members are encoded by gut microbes and 70% are found in Bifidobacteria [22]. The genomes of *R. bromii* and *B. adolescentis* each encode one putative CBM74-containing protein. The prevalence of CBM74 domains encoded within the genomes of RS2-degrading bacteria, and its increased representation in metagenomic and metatranscriptomic analyses from host diet studies, suggest a role for this module in RS2 recognition in the distal gut [23-25].

The *R. bromii* starch adherence system protein 6 (Sas6) is a secreted protein of 734 amino acids that contains both a CBM26 and CBM74 followed by a C-terminal dockerin type 1 domain [26, 27]. Here we present the biochemical characterization and crystal structure of Sas6, providing the first view of the CBM74 domain and its juxtaposition with the CBM26 domain. The co-crystal structure of *RbCBM74* with a double helical dimer of maltodecaose, which mimics the architecture of double helical amylopectin in starch granules, revealed recognition via an elongated groove spanning the domain. *RbCBM74* exclusively binds longer maltooligosaccharides ( $\geq 8$  glucose units), and native mass spectrometry suggests that both single and double helical  $\alpha$ -glucans are recognized, providing flexible recognition of amylose and amylopectin. Our biochemical data



demonstrate that CBM26 and CBM74 recognize different  $\alpha$ -glucan moieties within starch granules leading to overall enhanced granule binding.

## Results

**Modular Architecture of Sas6** – Sas6 consists of five discrete domains: an N-terminal CBM26 (*RbCBM26*), a CBM74 domain (*RbCBM74*) flanked by Bacterial Immunoglobulin-like (Blg) domains, and a C-terminal dockerin type I (**Fig. 1A**) [27]. Sas6 is encoded at the WP\_015523730 locus (formerly RBR\_14490 or Doc6, UniProt: A0A2N0UYM2) and includes a Gram-positive signal peptide (residues 1-30) that presumably targets the protein for secretion. *RbCBM74* spans residues 242-572 based on an alignment with annotated CBM74 domains [22]. We used InterProScan to annotate the remaining sequence which added the Bacterial Immunoglobulin-like (Blg, Pfam 02368) domain A (BlgA), but did not predict BlgB, which we identified via structure determination [28].

**Sas6 Cell Localization** – Though Sas6 has a signal peptide it is unknown whether it is a constituent of a cell-bound amylosome, or part of a freely secreted complex [20]. *R. bromii* synthesizes five scaffoldin (Sca) proteins that have cohesins for amylosome assembly; Sca2 and Sca5 are cell-bound and Sca1, Sca3, and Sca4 are freely secreted [20]. The cognate cohesin for the Sas6 dockerin is unknown. Sas6 is detected in the cell-free supernatant of *R. bromii* cultures in stationary phase but also elutes from the surface of exponentially growing cells with EDTA which disrupts the calcium-dependent cohesin-dockerin interaction [17, 29]. To determine the localization of Sas6, we grew cells to mid-log phase on potato amylopectin and performed a Western Blot with custom antibodies against recombinant Sas6 (**Fig. 1B**). Sas6 was detected in the cell fraction and not the cell-free culture supernatant (**Fig. 1B**), and was visualized on the cell surface via immunofluorescence (**Fig 1C**). Therefore, we conclude that Sas6 is a component of a cell-surface amylosome in actively growing cells. It is possible that Sas6 localization is

dependent upon growth phase, as are cellulosome components in some organisms, explaining its previous detection in culture supernatant [17]. Alternatively, *R. bromii*, like some cellulosome-producing bacteria, may release cell-surface amyloosomes in stationary phase [30].

**Sas6 Starch Binding** –CBM26 and CBM74 are putative raw starch-binding families [22, 31]. Plant sources of granular starch differ greatly in granule organization, including crystallinity (e.g., packing of the long helical chains), length of  $\alpha$ 1,4-linked chains, amylose location and organization, water content, and trace elements [7]. We used a truncated construct of Sas6 (residues 31-665) lacking the C-terminal dockerin domain, herein called Sas6T, to test Sas6 binding to starch polysaccharides. Sas6T binds potato, corn, and wheat starch granules, with the highest fraction of protein bound to corn starch, and no non-specific binding to Avicel (crystalline cellulose) (**Fig. 1D**). Of note, corn starch has a smaller granule size and therefore a larger surface area to mass ratio [8]. We tested Sas6T binding to amylopectin and amylose, as well as glycogen and pullulan via affinity PAGE. Glycogen is similar to amylopectin with more frequent  $\alpha$ 1,6 branching (every 6-15 residues for liver glycogen compared to 15-25 residues for amylopectin) [32, 33]. Pullulan is a fungal  $\alpha$ -glucan composed of repeating  $\alpha$ 1,6-linked maltotriose units [34]. Sas6T binds amylose, amylopectin (potato and corn), and glycogen but has less affinity for pullulan suggesting a preference for longer  $\alpha$ 1,4-linked regions within the polysaccharide (**Fig. 1E**). Sas6T does not bind dextran, a bacterially derived exopolysaccharide of  $\alpha$ 1,6-linked glucose [35], demonstrating its specificity for starch.

**Structure of Sas6** – The structure of Sas6T with  $\alpha$ -cyclodextrin (ACX), was determined via single-wavelength anomalous dispersion of intrinsic sulfur-containing residues to a resolution of 1.6Å ( $R_{\text{work}}$ =16.8%,  $R_{\text{free}}$ =21.2%) (**Table 1**). The final model contained two molecules of Sas6T in the asymmetric unit, with four  $\text{Ca}^{2+}$  per chain and one molecule of ACX bound at the *Rb*CBM26 domain. The Sas6T structure determined with ACX was used to phase a dataset from unliganded

crystals (2.2Å,  $R_{\text{work}}$ =19.7%,  $R_{\text{free}}$ =25.5%) (**Table 1**). The overall crystal structure of Sas6T is compact, with *RbCBM26*, BlgA and BlgB forming an arc over *RbCBM74* (**Fig. 2A**).

*RbCBM26*, *RbCBM74*, and the dockerin domain are separated by BlgA (light grey) and BlgB (dark grey), respectively (**Fig. 2A, Extended Data Fig 1A**). Ig-like or fibronectin-III domains act as spacers in multi-modular glycoside hydrolases including GH13s that target starch [36]. BlgA and BlgB interact via hydrogen bonding with 354Å of buried surface area [37] (**Extended Data Fig 1B**). This interaction may help stabilize or orient the CBM74 domain or the Blgs may act as a hinge between the CBMs. The two chains in the asymmetric unit exhibit some flexibility resulting in different positioning between the *RbCBM26* binding site and the *RbCBM74* domain (**Fig. 2B**).

*Small Angle X-Ray Scattering* – To better connect how our crystal structures correlate with conformational flexibility in solution, we used size-exclusion chromatography coupled with small angle x-ray scattering (SEC-SAXS) on Sas6T (**Table 1**). The elution separated out several peaks, including a single strong peak for that was well separated and monodisperse as indicated by the constant radius of gyration ( $R_g$ ) across the eluted peak (**Extended Data Fig 2A**). The Guinier fit of a subtracted scattering profile created from that peak gave  $R_g$  and  $I(0)$  values of  $29.44 \pm 0.04\text{Å}$  and  $0.04 \pm 3.65 \times 10^{-5}$  and the fit and normalized fit residuals confirmed this peak was monodisperse (**Extended Data Fig 2B**). The molecular weight of Sas6T from the SAXS data was calculated to be 61.0 kDa (theoretical 68.9 kDa) indicating it is primarily monomeric in solution [38]. The  $D_{\text{max}}$  from the  $P(r)$  function for Sas6T is 90Å. The overall shape of the  $P(r)$  function for Sas6T, calculated by indirect Fourier transform (IFT) using GNOM, has a relatively Gaussian shape that is characteristic of a globular compact particle with the main peak at  $r = \sim 30\text{ Å}$  (**Extended Data Fig 2C**) [39]. There is a small peak at  $r = 55\text{Å}$  which suggests there are two structurally separate motifs, possibly *RbCBM26* and *RbCBM74*. The dimensionless Kratky plot maxima for Sas6T are typical for a rigid globular protein (**Extended Data Fig 2D**). The small

plateau in the mid to high  $q$  region, around  $qR_g = 5$  in the dimensionless Kratky plot indicates some extension or disorder in the system. These results suggest the presence of two separate modules with flexibility between them, likely corresponding to the two CBMs.

We tested whether the crystal structure matched the solution data by fitting the crystal structure to the SAXS data using FoXS [40]. The fit had a  $\chi^2 = 2.46$  and showed systematic deviations in the normalized fit residual (**Extended Data Fig 2E**). This highlights that there are significant differences between the lowest energy conformation of Sas6T in the crystal structure and the structure of Sas6T in solution. We then used MultiFoXS with our high-resolution structure of Sas6T to account for the flexibility, assigning the linkers between the domains (residues 130-137 and 572-583) as flexible [40]. MultiFoXS gave a best fit with a 1-state solution with a  $\chi^2 = 0.96$  and calculated  $R_g$  of 29.2Å which corroborates the Guinier  $R_g$  calculation (**Extended Data Fig 2F**). An alignment of Chain A of the crystal structure and MultiFoXS model had a RMSD of 1.2Å over 347 pruned atom pairs (**Fig. 2C**). The MultiFoXS model shows a slightly more extended model for Sas6T in comparison to the crystal structure demonstrating that Sas6T has some flexibility in solution yet remains compact.

*Structure of RbCBM74* – *RbCBM74* (357 residues) has 21  $\beta$ -strands and 13 short  $\alpha$ -helices with a core  $\beta$ -sandwich fold of two sheets with five antiparallel  $\beta$ -strands (**Fig. 2D**, **Extended Data Fig 3A**). A third short  $\beta$ -sheet forms a convex face and two pairs of  $\beta$ -strands (residues 356-369 and 412-423) protrude from the region between the  $\beta$ -sandwich and the third  $\beta$ -sheet. In this structure, two short  $\beta$ -strands lie at the entrance and exit of the CBM74 domain, marking the domain boundaries (**Extended Data Fig 3B**).

A DALI search revealed that the central fold of *RbCBM74* most closely resembles CBM9 from *Thermotoga maritima* Xylanase10A (PDB ID: 1I82-A, Z-score: 9.8, RMSD: 3.2Å, identity: 17%) [41, 42] (**Extended Data Fig 3C**). *TmCBM9* binds glucose, cellobiose, cello- and xylo-oligomers at the reducing ends, and amorphous and crystalline cellulose [42]. *TmCBM9* (189

residues) is larger than most CBMs which range from 80-120 amino acids [42]. Despite the conserved core  $\beta$ -sandwich, *RbCBM74* displays several extra loops and  $\beta$ -strands. The ligand binding site of *TmCBM9* is formed by two Trp residues that create an aromatic clamp around cellobiose. *RbCBM74* W373 is conserved with one of these Trps and lies within an extended, shallow channel partially covered by residues 374-384 that form a flexible loop only resolved in one monomer (**Extended Data Fig 3D**).

There are three putative structural  $\text{Ca}^{2+}$  in the *TmCBM9* structure and four cations in *RbCBM74*, one of which aligns with a  $\text{Ca}^{2+}$  in *TmCBM9* (**Extended Data Fig 3E**). We modeled these cations as  $\text{Ca}^{2+}$  based upon coordination geometry and atomic distances (**Extended Data Fig 3F**) [43, 44].  $\text{Ca}^{2+}$ -1 and  $\text{Ca}^{2+}$ -2 are separated by 3.8Å and share three coordinating residues but only  $\text{Ca}^{2+}$ -2 is surface exposed.  $\text{Ca}^{2+}$ -3 is abutted by the loop connecting  $\beta$ -strands 2 and 3 and  $\text{Ca}^{2+}$ -4 is at the center of a loop formed by residues 256-264 and conserved with *TmCBM9*. Like *TmCBM9*, the  $\text{Ca}^{2+}$  ions in the *RbCBM74* structure may be important for structural stability [45].

**Molecular Basis of *RbCBM26* Binding** – The N-terminal *RbCBM26* displays a  $\beta$ -sandwich consistent with other members of the CBM26 family [21]. In both chains of the asymmetric unit, CH/ $\pi$  stacking with ACX is provided by W63 and Y55 with hydrogen bonding mediated by Y53, K101, Q103, and the peptidic oxygen of A107 (**Fig. 2E**). In chain A only, K97 provides hydrogen bonding with O3 of Glc6. In chain B, ACX lies 3.2Å from S286 of the CBM74 domain and hydrogen bonds with O2 and O3 of Glc3. In contrast, S286 is 9.5Å from ACX in chain A. The top structural homologs of *RbCBM26* from DALI are the CBM25 from *Bacillus halodurans* C-125 (*BhCBM26*) from  $\alpha$ -amylase G-6 (PDB ID: 2C3V-A, Z-score: 12.4, RMSD 1.9Å, identity: 16%) and CBM26 (*BhCBM26*) from the same enzyme (PDB ID: 6B3P-B, Z-score: 12.1, RMSD 1.9Å, identity: 20%) [41, 46]. Another top DALI result is *ErCBM26b* of Amy13K from *Eubacterium rectale* (PDB ID 2C3H-B, Z-score: 10.8, RMSD 1.7Å, identity: 19%). In all three CBM26 structures, the structure

and aromatic platforms for ligand recognition are conserved (**Extended Data Fig 4AB**). *RbCBM26*, in contrast to *ErCBM26* and *BhCBM26*, has a longer loop containing K97 and K101 that provide additional hydrogen bonding with ACX. Unlike *BhCBM26*, *RbCBM26* does not undergo a conformational change upon ligand binding (**Extended Data Fig 4C**) [31]. A sequence alignment with CBM26 members *BhCBM26*, *ErCBM26* and the *Lactobacillus amylovorus*  $\alpha$ -amylase CBM26 (*LaCBM26*), demonstrates conservation of the aromatic platform but more variation in the hydrogen-bonding network (**Extended Data Fig 4A**). Sas6 W63 corresponds to *LaCBM26* W32 that, when mutated, results in complete loss of binding [47]. The *R. bromii* protein Sas20 has a CBM26-like domain that shares 26% sequence identity with *RbCBM26*, yet *RbCBM26* shares more structural similarity with *BhCBM26* and *ErCBM26* [29].

**Binding Mechanism of Sas6** – We expressed the individual Sas6 CBMs and included the BlgA/B domains with the CBM74 (Blg-*RbCBM74*-Blg, residues 134-665) to enhance solubility. Sas6T and Blg-*RbCBM74*-Blg bound granular corn and potato starch, but *RbCBM26* did not bind either insoluble starch at detectable levels (**Fig. 2F**). Sas6T binds to more of the corn starch granule, ( $K_d = 2.8\mu\text{M} \pm 0.4$ ,  $B_{\text{max}} = 0.21\mu\text{mol/g} \pm 0.01$ ) but has a modestly higher affinity for potato starch ( $K_d = 1.9\mu\text{M} \pm 0.3$ ,  $B_{\text{max}} = 0.030\mu\text{mol/g} \pm 0.001$ ), which might be a function of the smaller granule size and larger surface to mass ratio for corn starch. Exclusion of the *RbCBM26* in the Blg-*RbCBM74*-Blg construct led to slightly better binding to corn starch ( $K_d = 1.5\mu\text{M} \pm 0.3$ ,  $B_{\text{max}} = 0.18\mu\text{mol/g} \pm 0.008$ ) and modestly higher affinity but less overall binding to potato starch ( $K_d = 0.51\mu\text{M} \pm 0.13$ ,  $B_{\text{max}} = 0.015\mu\text{mol/g} \pm 0.001$ ). The saturation curve for Blg-*RbCBM74*-Blg closely resembles that of Sas6T and there is minimal binding by *RbCBM26*, suggesting that *RbCBM74* drives insoluble starch binding.

The molecular patterns on the surface of starch granules differs between plant sources and remains an active area of research [48-51]. The “hairy billiard ball model” to describe starch granules postulates that the granule surface has block-like clusters of amylopectin chains with

hair-like extensions of amylose penetrating through the amylopectin [50]. Sas6T and Blg-*RbCBM74*-Blg bind amylose and amylopectin whereas *RbCBM26* only binds to amylopectin with apparently low affinity based upon the relatively small change in migration (**Fig. 2G**). This suggests that *RbCBM74* drives binding of Sas6 to the long, tightly packed helices of amylose at the surface of the starch granule.

Using isothermal titration calorimetry (ITC), we found that Sas6T and Blg-*RbCBM74*-Blg bound amylopectin with sub-micromolar affinity whereas binding was not detectable for *RbCBM26* (**Table 2; Extended Data Fig 5A**) [52]. Sas6T binds maltotriose (G3), maltoheptaose (G7), maltooctaose (G8) with a  $K_d$  in the hundreds of  $\mu\text{M}$  but exhibits a  $K_d$  of  $\sim 5\mu\text{M}$  for maltodecaose (G10) (**Table 2; Extended Data Fig 5B**). Interestingly, *RbCBM26* binds shorter linear oligosaccharides (G3, G7) and cyclodextrins, while Blg-*RbCBM74*-Blg had no detectable affinity for these sugars (**Table 2; Fig. Extended Data Fig 5C**). None of the constructs bound glucosyl- $\alpha 1,6$ -maltotriosyl- $\alpha 1,6$ -maltotriose, an oligosaccharide of pullulan, suggesting that the  $\alpha 1,6$  linkages are not specifically recognized by either domain. We determined that Blg-*RbCBM74*-Blg binds exclusively longer  $\alpha$ -glucans of at least 8 residues. Notably,  $\alpha 1,4$ -linked glucose polymers form double helices at 10 glucose units due to internal hydrogen bonding so we hypothesized that *RbCBM74* might accommodate starch helices [8].

*Molecular Basis of RbCBM74 Binding* – We co-crystallized Blg-*RbCBM74*-Blg with maltodecaose (G10) to 1.70Å resolution ( $R_{\text{work}}=17.9\%$ ,  $R_{\text{free}}=19.9\%$ ) (**Fig. 3A**). Remarkably, we observed two molecules of G10 as an extended double helix of  $\sim 42\text{\AA}$  along the face of *RbCBM74* extending from S286 (reducing ends) to W373 (non-reducing ends). There was strong electron density for 12 glucoses in one molecule, and nine glucoses in the other chain, likely reflecting varied occupancy of the helix along the binding cleft (**Fig. 3B**). H289, F326, and W373 stood out as surface exposed aromatic residues that might be providing CH- $\pi$  mediated stacking (**Fig. 3C**).



An overlay of the unliganded and G10 bound structures demonstrates little global change in the CBM74 domain upon binding (**Extended Data Fig 6A**), with the exception of G374 to K381. In the unliganded structure this loop occludes surface exposure of W373 and in the G10 bound structure the loop opens to create a continuous binding surface (**Extended Data Fig 6B**). Additionally,  $\text{Ca}^{2+}$ -4 is exchanged for  $\text{Na}^+$ , representing flexibility in ion identity at that site (**Extended Data Fig 6C**).

Canonical starch-binding domains feature two or three aromatic residues for pi-stacking interactions with the aglycone face of maltooligosaccharides, but *RbCBM74* is designed for extensive hydrogen-bonding interactions with longer oligosaccharides and starch [21]. The binding site is continuous and each G10 molecule interacts with protein as a stretch of three Glcs at a time, before the natural helical curvature brings the chain out of the contact with the protein (**Fig. 3D**). For example, at the non-reducing end, Glc 1-3 of G10 chain A (G10A) fit into the ligand-binding groove, while Glcs 4-6 of G10A are solvent exposed and Glc 1-3 of G10 chain B (G10B) then fill the cavity. Along the length of the cavity, from the non-reducing end to the reducing end, Glcs 1-3 and 7-9 of both G10A and G10B alternate to fill this binding site.

The binding cleft features a network of residues that hydrogen bond to the hydroxyl groups of glucose (**Fig. 3E**). At the non-reducing end, Glc A1 hydrogen bonds with the indole nitrogen of W373. Glc A2 stacks with W373 with hydrogen bonding provided by G374 and N403. Glc A3 hydrogen bonds with S338. The other molecule of G10 (B) contacts the next part of the binding groove and is anchored by hydrogen bonding of Glc B3 by R336 and Y524. Where the first molecule turns back into the binding groove, Glc A8 hydrogen bonds with E290, D549, and K556. Glc A9 hydrogen bonds with the backbone of H289 and pi stacks with F326. The H289 side chain hydrogen bonds with Glc B7 and provides aromatic character for pi stacking with Glc B8. Near the region of *RbCBM74* that lies adjacent to *RbCBM26*, K464 and S286 hydrogen bond with Glc B9.



To define the starch-binding properties of *RbCBM74* in solution, we employed Hydrogen–Deuterium eXchange Mass Spectrometry (HDX-MS). The conformational dynamics of Blg-*RbCBM74*-Blg alone and in the presence of G10 were measured over a 4-log timescale (**Extended Data Fig 7AB**). The overall conformational dynamics of the apo protein were consistent with the determined crystal structure, in terms of well-ordered domains and associated loops or flexible regions. The flanking Blg domains showed higher exchange rates than the core CBM74 domain. Intriguingly, the linker regions between domains do not show differentially high dynamic exchange, as would be expected for flexibly tethered independent domains, further supporting the integral nature of Blg-*RbCBM74*-Blg motif.

The binding of G10 to *RbCBM74* was explored by differential protection from exchange in the absence and presence of G10. Significant protection was observed in the presence of G10, while no significant increases in exchange were observed (**Extended Data Fig 7C**). This is consistent with the minimal global conformation changes between the two states of the protein. The protected regions upon G10 binding were highly localized to a single surface binding region (**Fig. 3F**). This protected region constitutes a single extended surface, which directly overlaps with the G10 binding site observed in the co-crystal structure (**Fig. 3EF**). With the exception of the peptide from A314-Y318 (ANTTY), each of the protected peptides identified by HDX-MS contains at least one key binding residue identified from the co-crystal structure (**Fig. 3E**). These data provide a comprehensive picture of the structural dynamics of *RbCBM74* binding to long maltooligosaccharides via an extended starch binding cleft.

***RbCBM74 Mutational Studies*** – Because most CBM binding is mediated by aromatics, we hypothesized that mutation of W373, F326, or H289 to Ala would dramatically decrease or eliminate binding. We tested maximum binding of each of the aromatic mutants to insoluble corn (1%) and potato starch (5%). The W373A and H289A constructs lost the ability to bind to insoluble corn starch while binding of the F326A construct was greatly reduced (**Fig. 4A**). This trend was

somewhat different for potato starch, in which a lower percentage of H289A bound compared to the F326A and W373A mutants. By affinity PAGE, neither the W373A nor the F326A mutant lost appreciable binding to amylopectin while the H289A mutant had a modest decrease in binding to potato amylopectin (**Fig. 4B**). When we quantified binding via ITC, W373A lost all binding for G10 while H289A and F326A had a ~10-20-fold decrease in affinity (**Table 2, Extended Data Fig 8A**). On potato amylopectin, F326A had a 10-fold reduction in affinity while H289A and W373A exhibited a ~20-fold reduction (**Extended Data Fig 8B**). That single mutations do not eliminate binding is perhaps not surprising given the extensive binding platform. Moreover, the enhanced affinity of these mutants to amylopectin over G10 further suggests that productive interactions with the protein extend beyond a 10-glucose unit footprint. Indeed, the somewhat staggered double helical G10 bound in our crystal structure suggests that at least 12 glucose units contribute to binding (**Fig. 3D**).

*Native mass spectrometry* – ITC revealed a binding stoichiometry of 1:1 between Blg-*RbCBM74*-Blg and G10, while the co-crystal structure demonstrates that two molecules of G10 are accommodated. To better determine the stoichiometry of this binding event, we employed native mass spectrometry in the presence of varying concentrations of G10 (**Fig. 5A**). Each observed state differed by ~1639 Da, which agrees with the theoretical mass of G10 (**Extended Data Table 1A**). To obtain binding affinities, we summed the peak intensities of all abundant charge states in our mass spectra and analyzed these intensity values as described previously [53] (**Extended Data Table 1B**). The  $K_d$  for Blg-*RbCBM74*-Blg was determined to be  $3.8 \pm 0.5 \mu\text{M}$ , which agrees with our ITC data. As the concentration of ligand is increased, ligand molecules can bind nonspecifically during the nESI process, generating artifactual peaks in the mass spectra corresponding to a two ligand-bound complex (**Fig. 5A**). We speculate that in excess concentrations of G10, the molecules can form double helices that are accommodated by the

*RbCBM74* binding site but that the single molecule binding event represents the most common binding conformation (**Fig. 5B**).

Because *Sas6* encodes both a CBM74 and a CBM26, and this co-occurrence is evolutionarily well-conserved, we speculated that *RbCBM26* and *RbCBM74* could either bind separate G10 molecules or that one ligand could span the region between the two CBM binding sites [22]. We used native mass spectrometry to determine the number of G10 molecules bound to *Sas6T*, which includes both CBMs. The binding state distribution was markedly different when *RbCBM26* was included (**Fig. 5C**). At low G10 concentrations, there is a mix of unliganded, 1-bound, and 2-bound states unlike *Blg-RbCBM74-Blg* alone (**Fig. 5D**). As G10 increases, the apo and 1-bound states decrease as the 2-bound fraction increases. For *Sas6T*,  $K_d$  values for 1:1 and 1:2 protein:ligand complexes were calculated to be  $3.4 \pm 0.5 \mu\text{M}$  and  $165.6 \pm 38.8 \mu\text{M}$ , respectively, and are in reasonable agreement with ITC data (**Extended Data Table 1B**). Together these results suggest that *RbCBM26* and *RbCBM74* each bind one molecule of G10 independently in solution. In the context of a starch granule, this supports a model whereby each CBM of *Sas6* binds adjacent  $\alpha$ -glucan chains rather than attaching to the same chain in a continuous manner. Moreover, the propensity for *Blg-RbCBM74-Blg* to bind a single helix of G10 at low ligand concentrations, as also observed with ITC, suggests that this binding platform prefers single helical  $\alpha$ -glucans such as amylose, though it can also tolerate double helical stretches of amylopectin.

**CBM74 Conservation** – To visualize conserved features of CBM74 domains, two alignments and a corresponding evolutionary tree were prepared. The first alignment includes all 99 CBM74 sequences (**Extended Data Fig 9A,B; Extended Data Table 2**) while the second was simplified for viewing and includes 33 representative CBM74 sequences (**Fig. 6**). Both alignments reveal that the CBM74s fall into 6 distinct clades (**Fig. 6A; Extended Data Fig 9A**). *RbCBM74* (No. 28) is in a distinct cluster of proteins (blue) that invariably include a dockerin domain as part

of the full-length protein. However, there are other CBM74 domains originating from dockerin-containing proteins found in three more groups (green, cyan, and magenta). The prototypical CBM74 of the subfamily GH13\_32  $\alpha$ -amylase from *Microbacterium aurum* (No. 52) bins into a clade (cyan) with its GH13\_32 counterpart from *Sanguibacter* sp. (No. 54) and the CBM74-containing  $\alpha$ -amylase from *Clostridium bornimense* (No. 58). A similar GH13\_28  $\alpha$ -amylase from *Streptococcus suis* (No. 68) is in the adjacent cluster (magenta) very close to the CBM74 domains from two other hypothetical dockerin-containing proteins from *Ruminococcus bovis* (No. 67) and Ruminococcaceae bacterium (No. 70). Most CBM74 domains appended to  $\alpha$ -amylases from the subfamily GH13\_28, predominantly from Bifidobacteria, group together in a separate cluster (red). Finally, the sixth cluster (walnut) covers CBM74 domains found in GH13\_19  $\alpha$ -amylases. In total, CBM74 domains occur in  $\alpha$ -amylases from several subfamilies or non-catalytic dockerin-containing proteins and are widely represented among Bifidobacteria.

We mapped the conservation of all 99 CBM74 family members onto our structure using CONSURF [54-56] (**Fig 6B**). While the central  $\beta$ -sandwich, ion-coordination sphere, and ligand binding site are highly conserved, the flexible loop in *Rb*CBM74 (residues 373-384) occluding the binding site is more variable (**Fig. 6C; Extended Data Fig. 9B**). In all but the three or four most closely related CBM74 sequences – covering only the two genera of *Ruminococcus* and *Eubacterium* – this loop is short or not present, though how this feature correlates with binding is unknown.

Most of the key aromatic residues that mediate starch-binding in *Rb*CBM74 are highly conserved (**Fig. 6C**). W373 from *Rb*CBM74 is 100% conserved among all 99 identified CBM74 family members (**Extended Data Fig 9B**), while H289 is shared with 78 sequences or substituted with a Tyr (18/99) in Bifidobacteria and *Candidatus scatavimonas* (No. 25) and a Trp (3/99) in *Pseudoscardovia* species. F326 is perhaps the most variable, sharing sequence identity or similarity with 3 of the 6 clades (F-19/99, Y-43/99), while the other clades feature a glycine or alanine in this position (36/99). The binding site also features an elaborate network of residues

that provide hydrogen bonding with the ligand. The residues at the center of the cleft including K556 (80/99), D549 (63/99), and E290 (99/99) exhibit the highest conservation (**Fig. 6C; Extended Data Fig 9B**). The hydrogen bonding residues at the ends of the cleft are more varied, including S286 (22/99) which interacts with the *RbCBM26* ligand. Intriguingly, in a large proportion of the sequences there is an aromatic residue at the site of K556 (W-19/99) and Y524 (Y-12/99, F-45/99) that could provide pi stacking in those CBM74s. This moderate variability in the composition of the putative binding site may suggest that CBM74 family members have different affinities for starch.

## Discussion

CBMs are distinct protein domains that assist with substrate breakdown by specifically binding polysaccharide targets. These domains are especially important for binding to insoluble substrates like crystalline cellulose and semi-crystalline starch granules. The CBM74 family binds insoluble starch and its constituents, amylose and amylopectin. CBM74 domains are frequently (81/99 sequences) encoded adjacent to another starch-binding CBM family, either a CBM25 or CBM26 [22]. Sas6 includes both a CBM26 and a CBM74 domain that have different affinities for maltooligosaccharides but work together to bind granular starch. *RbCBM26* has a canonical binding platform that accommodates motifs found in linear and circular maltooligosaccharides. In contrast, *RbCBM74* has an extended ligand binding groove that requires at least 8 glucose residues and accommodates the single helices of amylose and the double helices found in amylopectin. Because it is on the cell surface, the CBM74 domain of Sas6 may target *R. bromii* to the crystalline regions of starch granules that are not easily accessible to human or other bacterial amylases.

Sas6 is a putative *R. bromii* amylosome component and likely cooperates with amylases and pullulanases via the interaction of its dockerin domain with a cohesin from a scaffoldin protein

[20]. Because Sas6 is found on the cell surface, it could bind cell anchored scaffoldins Sca2 or Sca5, associate with Sca1/Amy4, or bind the cell surface in a dockerin-independent mechanism [20]. Breakdown of starch by *R. bromii* relies on the coordinated effort of approximately 40 distinct proteins, of which Sas6 may play an integral part by specifically targeting the helical regions of starch [20].

Unlike *R. bromii*, resistant starch-utilizing Bifidobacteria encode CBM74-containing multimodular extracellular amylases [9]. A recent study looked at the amylases that were differentially encoded between Bifidobacterial strains that could bind and degrade starch granules and those that could not [57]. Resistant Starch Degrading enzyme 3 (RSD3) was differentially encoded in the resistant starch-binding strains. It contains a CBM74 domain and has high activity on high amylose corn starch. RSD3 has an N-terminal GH13 domain followed by CBM74, CBM26, and CBM25 domains. The CBM74-CBM26 motif is present in RSD3 so the structural and functional insights we have gleaned from Sas6 may suggest how these CBMs structurally assist the enzyme with granular starch hydrolysis.

Although starch is a polymer composed solely of glucose, there is massive variation in granule structure [7, 8]. This is a function of primary structure (i.e.  $\alpha$ 1,4 or  $\alpha$ 1,6 linkages), secondary structure (single or double helices) and tertiary structure (helical packing and amylose content), making granules an exquisitely complex substrate [58]. This complexity is unlocked by only a few specialized gut bacteria, making granular starch a targeted prebiotic [9, 15, 16]. CBM74 domains might serve as a molecular marker for the ability to break down resistant starch in metagenomic samples [22]. Furthermore, CBM74 domains might make attractive additions to engineered enzymes for enhanced starch degradation on the industrial scale, or as an adjunct to starch prebiotics. The structural and functional picture of *Rb*CBM74 here will accelerate the targeted use of this domain for various health and industrial applications.

| Table 1: X-ray Data Collection and Refinement Statistics |                                |                            |                            |
|----------------------------------------------------------|--------------------------------|----------------------------|----------------------------|
| Construct                                                | Sas6T + $\alpha$ -cyclodextrin | Sas6T unliganded           | Blg-RbCBM74-Blg + G10      |
| PDB Accession                                            | 7UWW                           | 7UWU                       | 7UWV                       |
| Wavelength                                               | 0.979                          | 0.979                      | 0.979                      |
| Resolution range                                         | 35 - 1.61 (1.67 - 1.61)        | 44.77 - 2.19 (2.27 - 2.19) | 62.48 - 1.70 (1.76 - 1.70) |
| Space group                                              | P 21 21 21                     | P 21 21 21                 | P 21 21 2                  |
| Unit cell                                                | 69.5 82.5 213.5 90 90 90       | 69.2 82.4 213.3 90 90 90   | 69.7 160.1 67.8 90 90 90   |
| Total reflections                                        | 1690626 (29309)                | 1044914 (104226)           | 512772 (51008)             |
| Unique reflections                                       | 122358 (2727)                  | 63042 (6261)               | 84071 (8261)               |
| Multiplicity                                             | 13.8 (10.7)                    | 16.6 (16.9)                | 6.1 (6.2)                  |
| Completeness (%)                                         | 76.8 (24.8)                    | 99.34 (99.97)              | 99.9 (100.0)               |
| Mean I/sigma(I)                                          | 16.0 (1.1)                     | 22.66 (14.34)              | 17.2 (2.2)                 |
| R-merge                                                  | 0.092 (1.799)                  | 0.0956 (0.192)             | 0.052 (0.75)               |
| R-meas                                                   | 0.095 (1.889)                  | 0.0987 (0.1979)            | 0.057 (0.81)               |
| R-pim                                                    | 0.025 (0.563)                  | 0.0243 (0.04781)           | 0.023 (0.33)               |
| CC1/2                                                    | 0.999 (0.549)                  | 0.998 (0.993)              | 0.999 (0.822)              |
| Reflections used in refinement                           | 122315 (3895)                  | 63244 (6262)               | 84061 (8260)               |
| Reflections used for R-free                              | 6093 (201)                     | 3200 (309)                 | 4056 (427)                 |
| R-work                                                   | 0.168 (0.238)                  | 0.197 (0.276)              | 0.179 (0.279)              |
| R-free                                                   | 0.212 (0.281)                  | 0.255 (0.348)              | 0.199 (0.281)              |
| Number of non-hydrogen atoms                             | 11425                          | 10523                      | 4954                       |
| macromolecules                                           | 9721                           | 9527                       | 4043                       |
| ligands                                                  | 253                            | 38                         | 237                        |
| solvent                                                  | 1451                           | 964                        | 674                        |
| Protein residues                                         | 1294                           | 1246                       | 531                        |
| RMS(bonds)                                               | 0.013                          | 0.001                      | 0.013                      |
| RMS(angles)                                              | 1.4                            | 0.4                        | 1.7                        |
| Ramachandran favored (%)                                 | 96.3                           | 96.1                       | 97                         |
| Ramachandran allowed (%)                                 | 3.6                            | 3.9                        | 3                          |
| Ramachandran outliers (%)                                | 0.08                           | 0                          | 0                          |
| Rotamer outliers (%)                                     | 0                              | 1.6                        | 0.5                        |
| Clashscore                                               | 3.26                           | 4.98                       | 0.24                       |
| Average B-factor                                         | 22.2                           | 25.6                       | 33.2                       |
| macromolecules                                           | 20.7                           | 25.4                       | 31.8                       |
| ligands                                                  | 35.8                           | 29.9                       | 31.5                       |
| solvent                                                  | 30                             | 27.8                       | 41.8                       |

443

444

445

446

| Table 2: Sas6 and domain binding via Isothermal Titration Calorimetry |    |                     |     |                     |    |                     |    |                     |     |                     |                     |
|-----------------------------------------------------------------------|----|---------------------|-----|---------------------|----|---------------------|----|---------------------|-----|---------------------|---------------------|
|                                                                       | G3 |                     | ACX |                     | G7 |                     | G8 |                     | G10 |                     | Potato AP           |
|                                                                       | n  | K <sub>d</sub> (μM) | n   | K <sub>d</sub> (μM) | n  | K <sub>d</sub> (μM) | n  | K <sub>d</sub> (μM) | n   | K <sub>d</sub> (μM) | K <sub>d</sub> (μM) |
| Sas6T                                                                 | 1* | 880 ± 25            | 1.0 | 178 ± 26            | 1* | 332 ± 15            | 1* | 496 ± 260           | 0.9 | 5.5 ± 1.9           | 0.3 ± 0.08          |
| RbCBM26                                                               | -  | NB                  | 0.8 | 169 ± 16            | 1  | 310 ± 34            | 1* | 285 ± 84            | 0.7 | 252 ± 128           | NB                  |
| Blg-RbCBM74-Blg                                                       | -  | NB                  | -   | NB                  | -  | NB                  | 1* | 820                 | 0.9 | 5.2 ± 1.1           | 0.7 ± 0.05          |
| W373A                                                                 |    |                     |     |                     |    |                     |    |                     | NB  | NB                  | 13.4 ± 5.4          |
| H289A                                                                 |    |                     |     |                     |    |                     |    |                     | 0.5 | 73.1 ± 7.7          | 21.4 ± 3.1          |
| F326A                                                                 |    |                     |     |                     |    |                     |    |                     | 0.7 | 100 ± 11            | 3.9 ± 1.4           |

447

448

449

450

451

452

453

454

455

456

457

\* indicates that n was set to 1. Experiments were performed in triplicate with mean ± standard deviation reported. For amylopectin, curves were modeled for total binding (n=1).



458

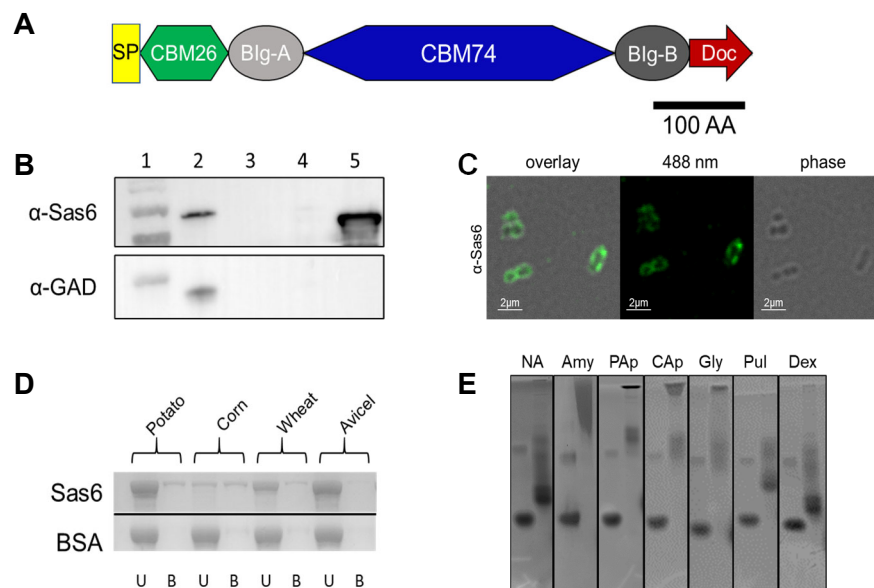

459

**Figure 1: *Ruminococcus bromii* Sas6 is a starch-binding protein that contains two carbohydrate-binding modules.** **A.** Domain architecture of Sas6 annotated according to the Carbohydrate Active Enzyme database ([www.cazy.org](http://www.cazy.org)) and the crystal structure. SP = Signal Peptide, CBM26 = Carbohydrate Binding Module family 26, Blg = Bacterial Immunoglobulin, CBM74 = Carbohydrate Binding Module family 74, Doc = Dockerin. **B.** *Top:* Western blot with anti-Sas6 antibody showing localization of Sas6 in the cell fraction. *Bottom:* Parallel western blot with custom rabbit antiserum against glutamic acid decarboxylase to control for cell lysis. Lane 1: ladder, 2: *R. bromii* cell lysate, 3: cell-free culture supernatant, 4: TCA precipitated cell-free culture supernatant, 5: recombinant Sas6T, truncated version of Sas6 lacking the C-terminal dockerin. **C.** α-Sas6 immunofluorescent staining of fixed *R. bromii* cells grown in potato amylopectin. **D.** SDS-PAGE gel from Sas6 adsorption to potato, corn, and wheat starch, and Avicel (cellulose) control. U=unbound protein, B=bound protein. **E.** Affinity PAGE with 0.1% of the indicated polysaccharide incorporated into the gel matrix. For each, left lane is bovine serum albumin, right lane is Sas6T. NA= native gel, Amy=potato amylose, PAp=Potato Amylopectin, CAp=corn amylopectin, Gly=Glycogen, Pul=Pullulan, Dex=Dextran.

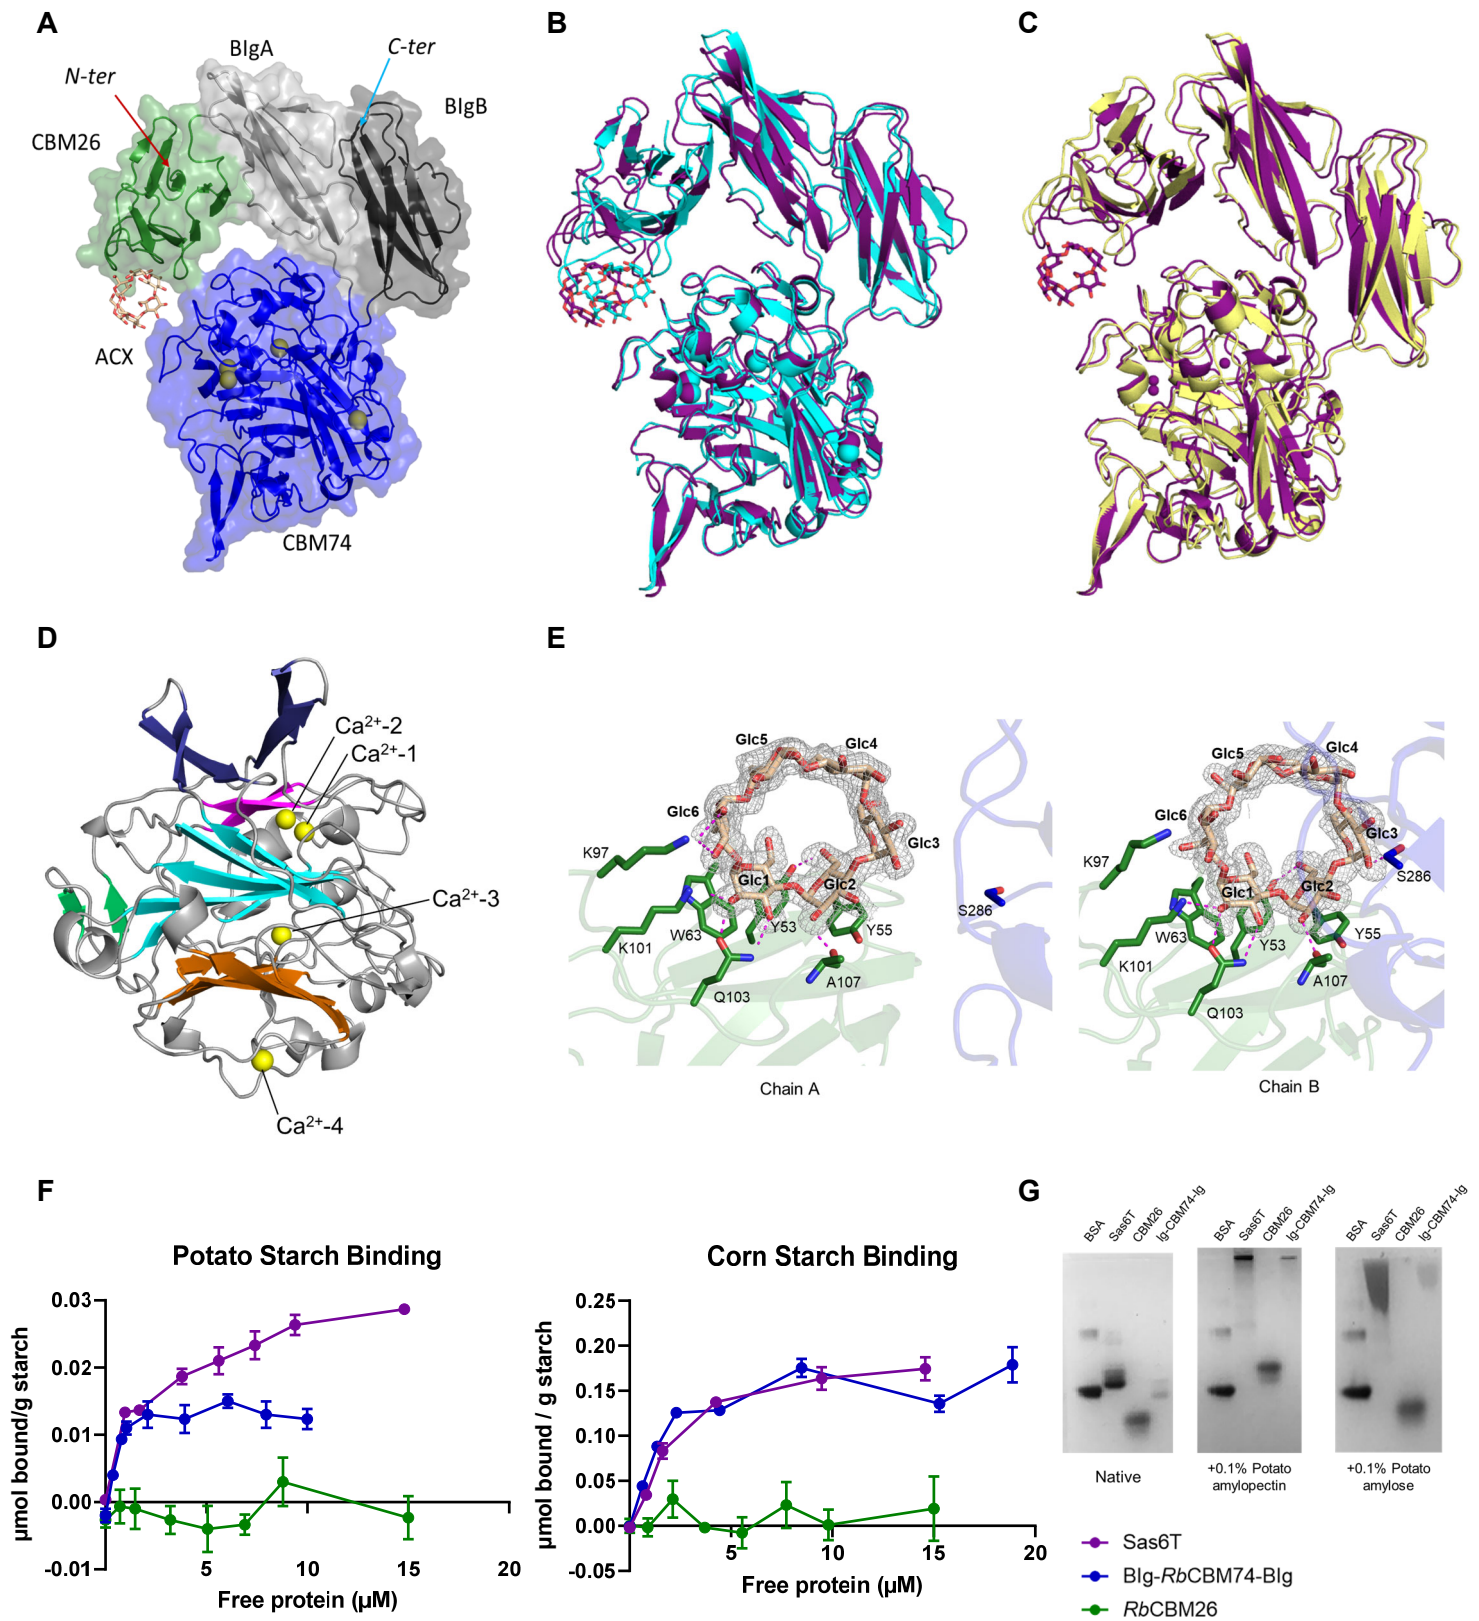

**Figure 2: Sas6 is a compact protein with two Blg domains that orient *RbCBM26* and *RbCBM74*.** **A.** Semi-transparent surface rendition and cartoon of Sas6T (PDB 7uww) with *RbCBM26* domain in green, BlgA in light grey, *RbCBM74* in blue, and BlgB in dark grey. The  $\alpha$ -cyclodextrin (ACX) bound to *RbCBM26* is shown in wheat sticks and  $\text{Ca}^{2+}$  atoms are shown as yellow spheres. **B.** Overlay of Chain A (purple) and Chain B (cyan) within the asymmetric unit of 7uww showing variation in the position of ACX relative to *RbCBM74*. **C.** Overlay of Chain A of 7uww (purple) and SAXS-derived MultiFoXS model (yellow). **D.** Side view of *RbCBM74* with the central  $\beta$ -sandwich sheets in orange and cyan. A third  $\beta$ -sheet is shown in magenta and the protruding pairs of  $\beta$ -strands and in dark blue.  $\beta$ -strands connecting the beginning and end of the *RbCBM74* domain are colored green.  $\text{Ca}^{2+}$  atoms are shown as yellow spheres. **E.** ACX bound at *RbCBM26* (green) in chain A (left) and chain B (right), demonstrating minor conformational flexibility that places S286 from *RbCBM74* (blue) within the binding site. Side chains involved in ligand binding are shown as green sticks with a hydrogen bond cutoff of 3.2Å. ACX is displayed as wheat sticks. Omit map is contoured to  $2.0\sigma$  and carved within 1.6Å of ACX ligand. **F.** *RbCBM74* drives binding to granular potato and corn starch. Binding to granular starch was determined by isotherm depletion. The  $\mu\text{moles}$  of protein bound per gram of starch was plotted against [free protein] to determine dissociation constants ( $K_d$ ) and binding maxima ( $B_{\text{max}}$ ) using a one-site specific binding model in GraphPad prism. **G.** Affinity PAGE of Sas6T or individual domains, *RbCBM26* and Blg-*RbCBM74*-Blg, with 0.1% polysaccharide. BSA= bovine serum albumin.

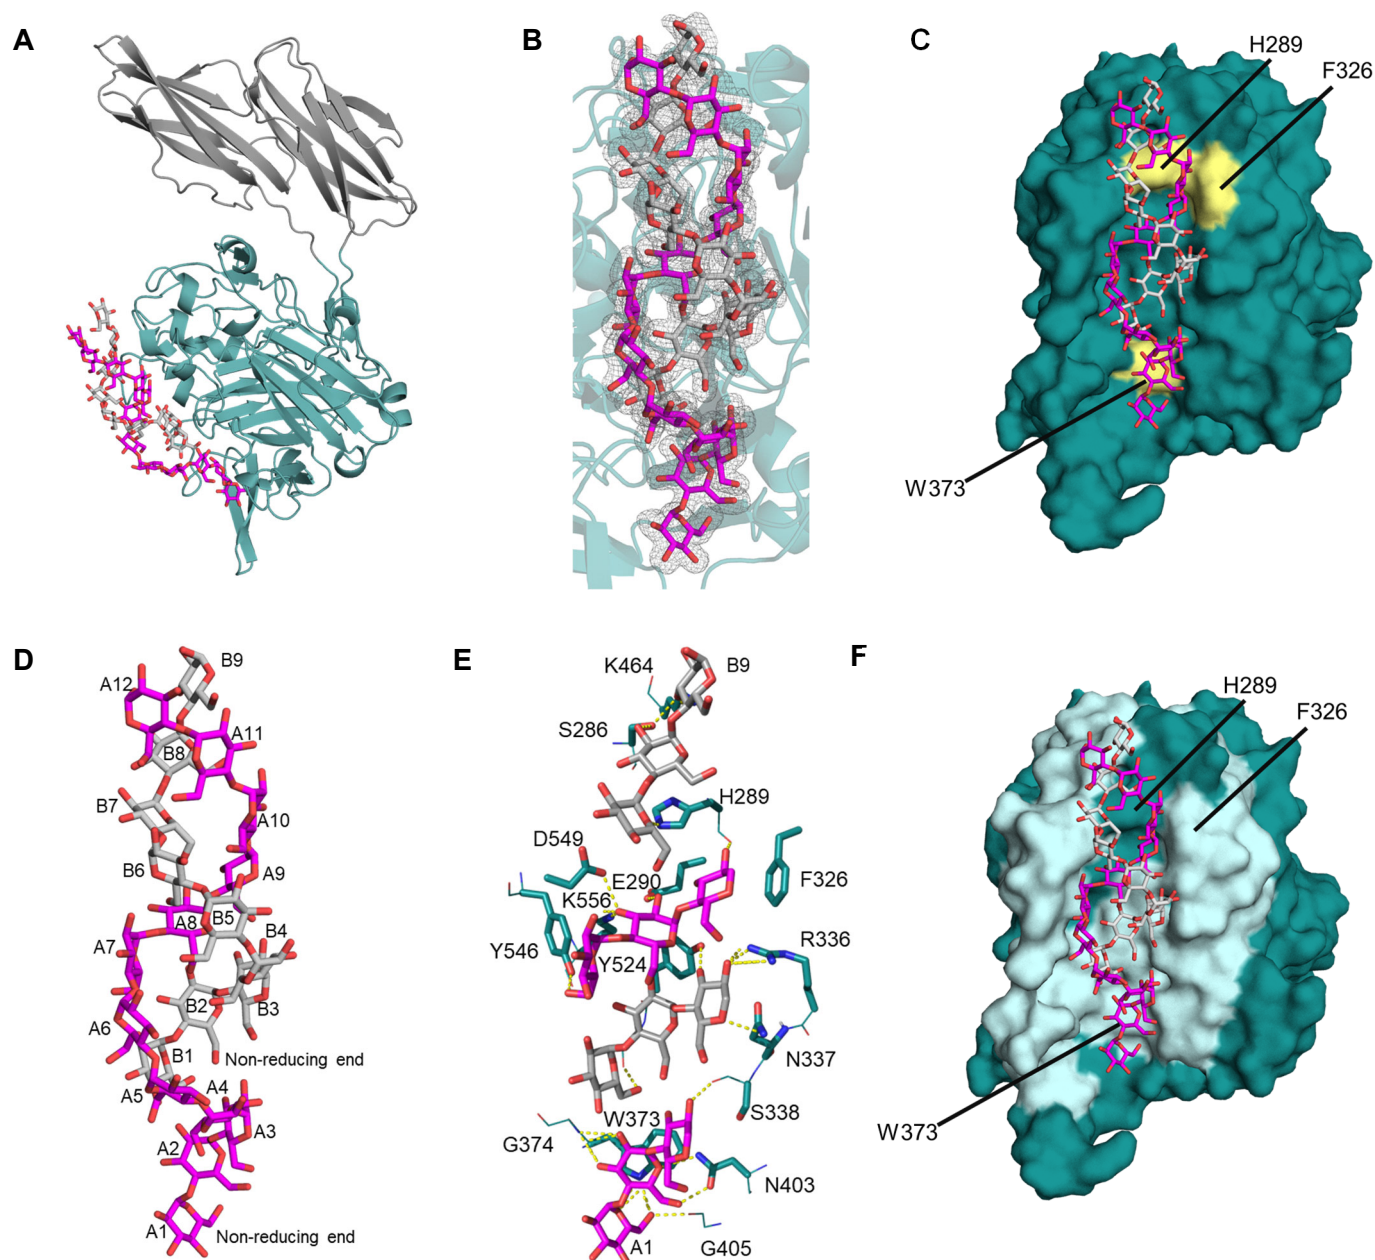

**Figure 3: *RbCBM74* has an extended groove that accommodates starch double helices.**

**A.** The Blg-*RbCBM74*-Blg (PDB 7uwv) starch-binding site is an extended groove that spans nearly the length of the domain. A cartoon representation of BlgA in light grey, CBM74 in teal, and BlgB in dark grey with two chains of maltodecaose (G10) wrapped around one another shown in magenta and grey sticks. **B.** *RbCBM74* is co-crystallized with G10 in a double helical conformation. Electron density for G10 demonstrated by an omit map contoured to  $2.0\sigma$  and carved to  $1.6\text{\AA}$  with one chain of modeled Glc in magenta and the other in grey. **C.** *RbCBM74* has an inset binding groove that accommodates the width of the starch double helix with aromatic CH- $\pi$  stacking provided by W373, F326, and H289. A surface representation of CBM74 (teal) with aromatic residues colored in yellow and G10 represented by magenta and



grey sticks. **D.** Double helical G10 structure with Glc residues labeled from non-reducing to reducing ends. One chain of G10 (A1-12) shown in magenta and the other in grey (B1-9) sticks. **E.** Corresponding hydrogen-bonding network (3.2Å cutoff) between *RbCBM74* and G10. Side chains involved in hydrogen bonding are shown in teal sticks with nitrogens indicated in blue and oxygens in red. Hydrogen bonds are indicated by yellow dashed lines and G10 residues directly involved in binding are shown in magenta (G10 molecule A) and grey (G10 molecule B) sticks. **F.** Surface representation of *RbCBM74* with peptides protected from deuterium exchange in the presence of G10 colored in light cyan as determined by hydrogen-deuterium exchange mass spectrometry.

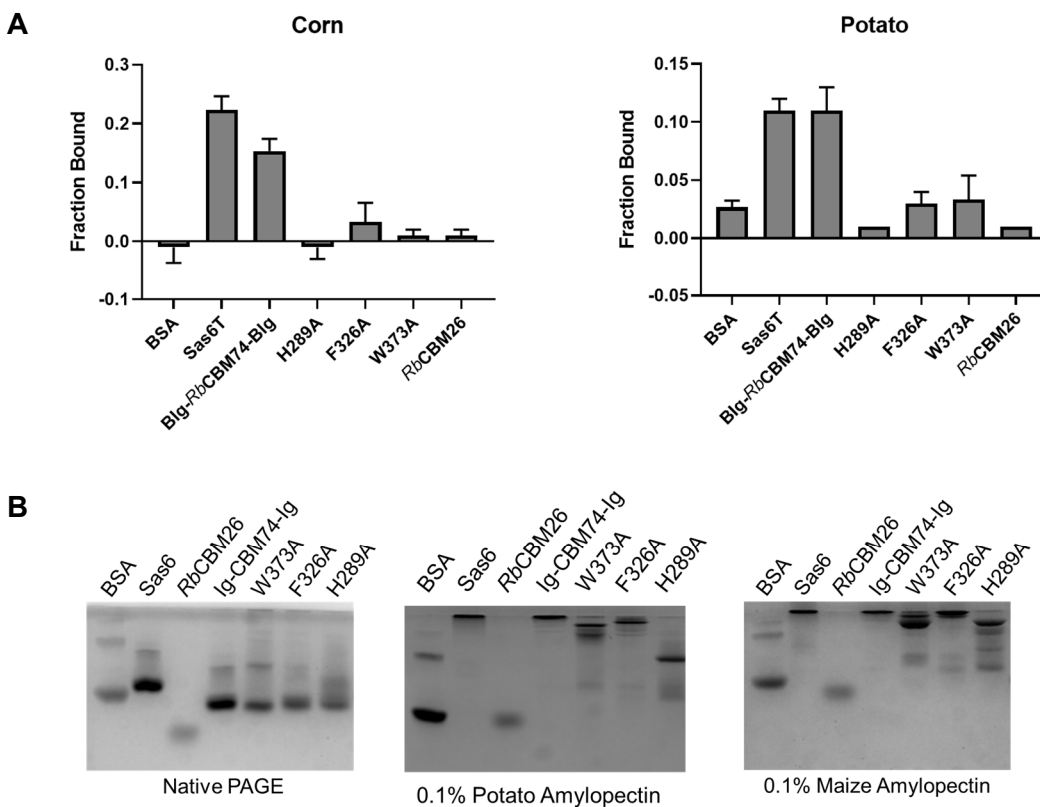

**Figure 4: W373A, F326A, and H289A mediate starch binding by *RbCBM74*.** **A.** Binding to insoluble starch is eliminated or greatly reduced when W373, H289 or F326 is mutated. The amount of protein bound to starch granules was determined by quantitation of protein remaining in solution after binding (n = 3). **B.** Mutation of aromatic residues decreases but does not eliminate binding to amylopectin. Affinity PAGE with 0.1% potato amylopectin or maize amylopectin added to the gel matrix. Binding is indicated by reduced migration through the gel.

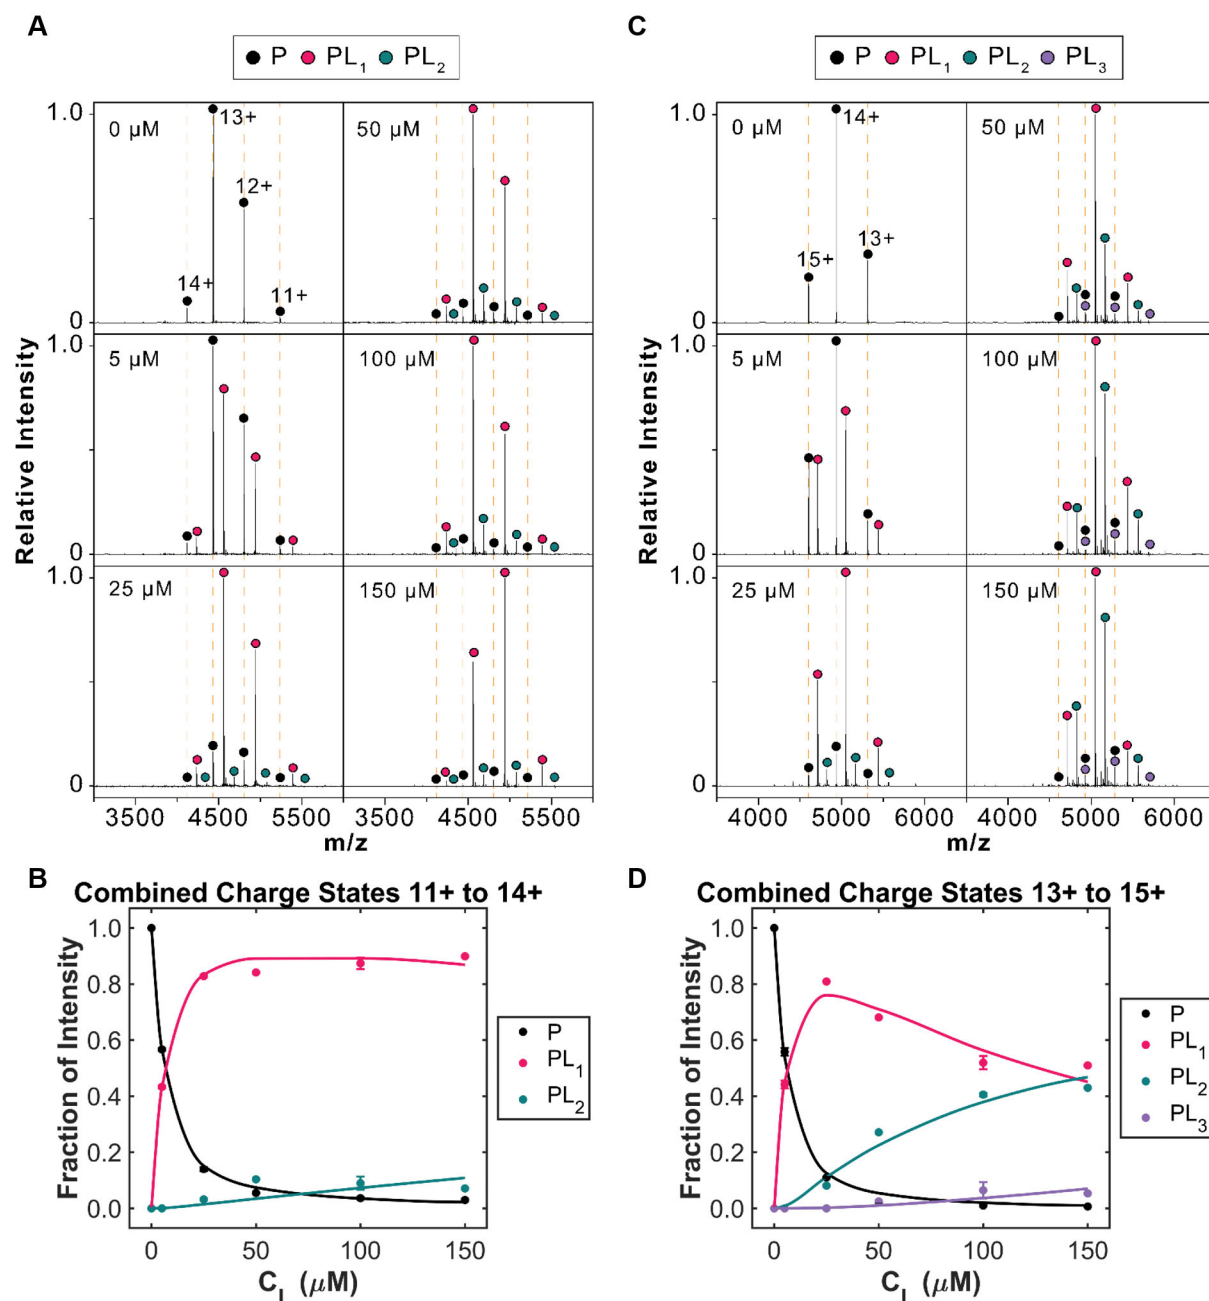

**Figure 5: *RbCBM74* and *RbCBM26* bind separate molecules of G10 in solution.** **A.** Mass spectra of Blg-*RbCBM74*-Blg at different ligand concentrations (0 - 150  $\mu\text{M}$ ) and a fixed protein concentration of 5  $\mu\text{M}$ . Charge states for unbound protein are annotated with an orange dashed line. Peaks corresponding to different bound states are observed after each charge state of the unbound protein. Intensities of each species, combined across multiple charge states, were then extracted from the mass spectra and used to calculate the fractional abundance of unbound and bound states at equilibrium ( $n=3$ ). **B.** Nonlinear least-squares fitting of the titration data for Blg-*RbCBM74*-Blg. **C.** Mass spectra of Sas6T as described in A. **D.** Nonlinear least-squares fitting of the titration data for Sas6T.

534

A

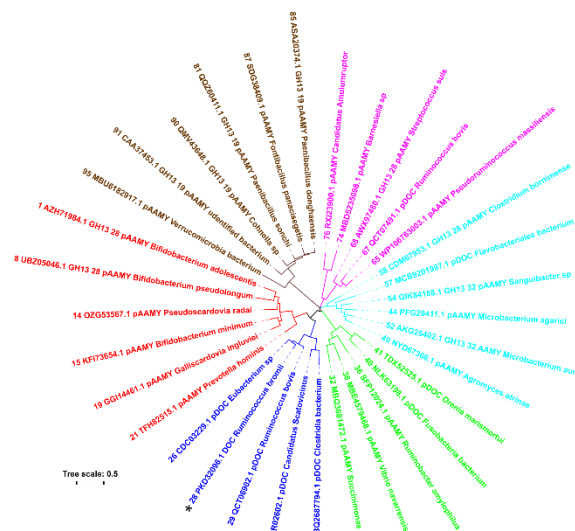

B

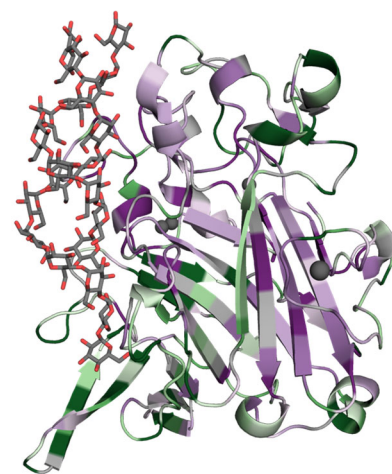

C

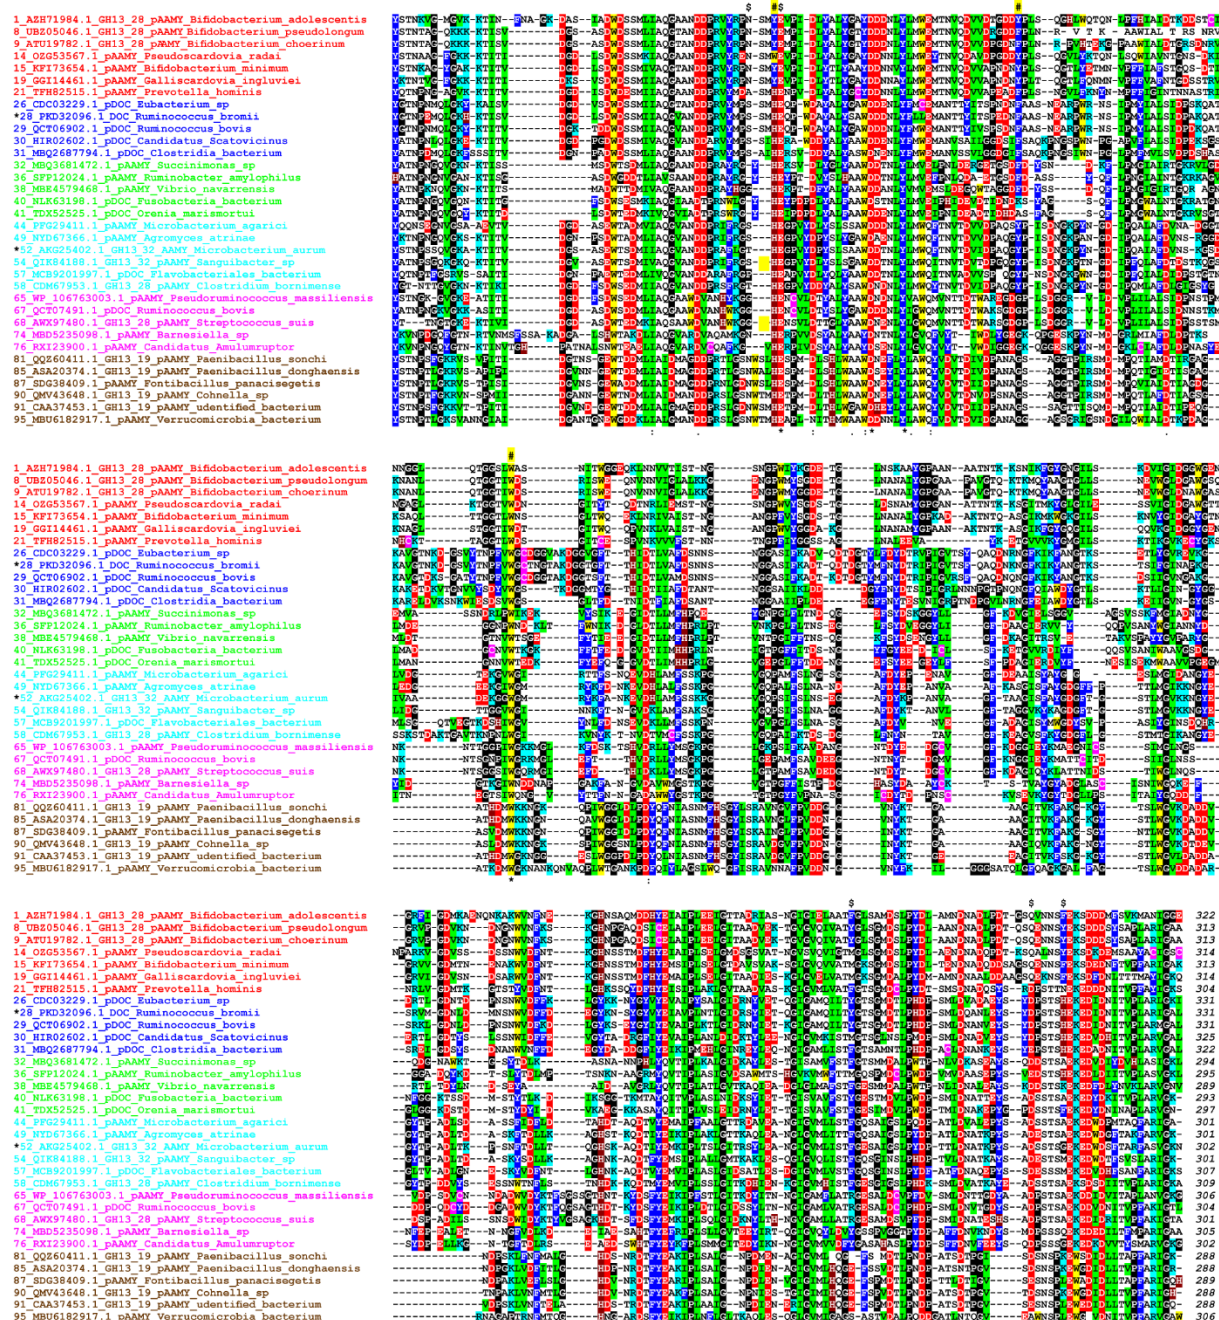



535

536 **Figure 6: Conservation of binding residues among select CBM74 family members. A.**  
 537 Evolutionary tree for the CBM74 family including 33 sequences selected from the entire studied  
 538 set of 99 CBM74s (Extended Data Table 2). Two experimentally characterized CBM74s are  
 539 marked by an asterisk: Sas6 from *Ruminococcus bromii* (No. 28, blue cluster) and the subfamily  
 540 GH13\_32  $\alpha$ -amylase from *Microbacterium aurum* (No. 52; cyan cluster). Protein labels include  
 541 the order number (33 selected from 1-99), GenBank accession number, abbreviation of the  
 542 source protein/enzyme and organism name. The tree is based on the alignment (shown in C)  
 543 spanning the complete CBM74 sequences. **B.** Structure of *RbCBM74* (PDB 7uwv) colored by  
 544 conservation score from least conserved (green) to most conserved (purple) generated using  
 545 CONSURF. **C.** Sequence alignment of the CBM74 family. The six individual groups  
 546 distinguished from each other by different colors correspond to six clusters seen in the  
 547 evolutionary tree (panel A); the sequence order in the alignment reflects their order in the tree in  
 548 the anticlockwise manner (starting from the first sequence in the red cluster). The residues  
 549 responsible for stacking interactions and involved in hydrogen bonding with glucose moieties of  
 550 the bound  $\alpha$ -glucan are signified by a hashtag and a dollar sign, respectively, above the  
 551 alignment. The flexible loop observed in the three-dimensional structure of the *RbCBM74* is  
 552 highlighted by the short yellow strip over the alignment. Identical and similar positions are  
 553 signified by asterisks and dots/semicolons under the alignment blocks. The color code for the  
 554 selected residues: W, yellow; F, Y – blue; V, L, I – green; D, E – red; R, K – cyan; H – brown; C  
 555 – magenta; G, P – black. The alignment of all 99 CBM74 sequences of the present study shown  
 556 in Extended Data Figure 9B.  
 557

558

## 559 METHODS

### 560 *Recombinant Protein Cloning and Expression*

561 We used a previously described cloning and expression protocol to generate each of the  
 562 recombinant protein constructs used in this study [59]. Genomic DNA was isolated from *R. bromii*  
 563 strain L2-63 and the constructs for Sas6 without the signal peptide were amplified using the  
 564 primers listed in **Table S1** with overhangs complementary to the Expresso T7 Cloning &  
 565 Expression System N-His pETite vector (Lucigen). The forward primers were engineered to  
 566 include the 6x His sequence that complemented the vector plus a TEV protease recognition site  
 567 for later tag removal. PCR was performed with Flash PHUSION polymerase (ThermoFisher). The  
 568 amplified products and the linearized N-his pETite vector were transformed in HI-Control10G  
 569 Chemically Competent Cells (Lucigen) and plated on LB plates supplemented with 50  $\mu$ g/ml  
 570 kanamycin (Kan). Transformants were screened for the insertion of Sas6 and validated via



sequencing. The Sas6-pETite plasmids were transformed into chloramphenicol (Chl)-resistant *E. coli* Rosetta (DE3) pLysS cells and plated on LB plates supplemented with 50µg/ml Kan and 20µg/mL Chl. *E. coli* cells were grown at 37°C to OD<sub>600</sub> 0.6-0.8 in Terrific Broth supplemented with 50µg/ml Kan and 20µg/ml Chl after which time the temperature was lowered to 20°C and 0.5mM Isopropyl β-d-1-thiogalactopyranoside (IPTG) was added. After 16 hours of growth, 1L of cells was centrifuged, resuspended in 40mL of Buffer A (20mM Tris pH 8.0, 300mM NaCl) and lysed by sonication. Cell lysate was separated from cell debris by centrifugation for 30min at 30,000xg. 3mL of Ni-NTA resin was packed into Econo-Pac Chromatography Columns (BioRad) and equilibrated with Buffer A. Lysate was passed through the packed columns and washed with 70mL of Buffer A. Proteins were eluted from the columns via stepwise increase in Buffer B (20mM Tris pH 8.0, 300mM NaCl, 500mM imidazole). Proteins eluted in 10-25% Buffer B fractions. TEV protease (1mg) was added to each protein to initiate cleavage of the His-tag and the mix was dialyzed overnight using dialysis tubing (SpectraPor) in 1L of storage buffer (20mM HEPES pH 7, 100mM NaCl). The dialyzed protein-TEV mixture was applied to Ni-NTA resin and the flow-through was collected and concentrated using a VivaSpin 20 concentrator (Fisher Scientific).

#### *Sas6 Immunofluorescence*

Custom α-Sas6T antiserum was generated by rabbit immunization with purified recombinant Sas6T protein (Lampire Biological Laboratories). The resulting antiserum was used for western blotting and cell staining. *R. bromii* cells were grown to mid-log phase on RUM media [17] with 0.1% potato amylopectin and 2mL of the cell culture was collected for immunostaining and western blotting. For immunostaining, 1mL of *R. bromii* culture was centrifuged for 1min at 13,000xg and washed 3 times with 1X phosphate buffered saline pH 7.4 (PBS). 2µL of cells were then spread on a glass slide and fixed with 10% formaldehyde in PBS. Slides were washed 3x in PBS to remove fixative but were not permeabilized. Cells were blocked for 30min with 10% goat

serum (Jackson ImmunoResearch).  $\alpha$ -Sas6T antiserum was diluted 1:1000 in 10% goat serum and applied for 1hr to cells at room temperature. The primary antiserum was removed, and slides were washed 3 x 5min in PBS before the application of 1:500 goat  $\alpha$ -rabbit AlexaFluor488 antibody (ThermoFisher) for 30min. Slides were washed 3 x 5min in PBS and preserved with Prolong Gold Antifade reagent and dried overnight before imaging. Cells were imaged at the University of Michigan Microscopy Core on a Leica Stellaris Light Scanning Confocal microscope with a 100X objective.

### *Western Blotting*

*R. bromii* was grown to mid-log phase overnight on RUM media containing 0.1% potato amylopectin [17]. 1mL of cells was pelleted and washed twice in phosphate buffered saline (PBS) pH 7.4, then resuspended to a final volume of 50 $\mu$ L in 5mM Tris-HCl pH 8.5. The culture supernatant was passed through a 0.2 $\mu$ m filter and 50 $\mu$ L was reserved for analysis. Proteins were precipitated from the remaining supernatant by the addition of ¼ volume of 100% trichloroacetic acid (TCA) and incubated 30 min on ice. The precipitate was collected via centrifugation and washed twice with 200 $\mu$ L cold acetone. The resulting pellet was dried and resuspended in 50 $\mu$ L of 5mM Tris-HCl pH 8.5. Samples were separated by SDS-PAGE on two 10% Tris-glycine gels, then transferred to polyvinylidene difluoride (PVDF) membrane. Blots were blocked in EveryBlot Blocking Buffer (BioRad) for 30min then washed with PBS pH 7.4 + 0.05% Tween 20 (PBST). To detect Sas6, one membrane was incubated with custom rabbit  $\alpha$ -Sas6 antiserum (Lampire) diluted 1:500 and the other with custom rabbit  $\alpha$ -glutamic acid decarboxylase from *R. bromii* (Lampire) diluted 1:10,000 in PBST + 5% non-fat dry milk (PBST-milk) for 1hr. Blots were washed in PBST and incubated in horse radish peroxidase-conjugated goat  $\alpha$ -rabbit antibody (ThermoFisher) diluted 1:5,000 in PBST-milk and the signal was detected by ECL chemiluminescence (ThermoFisher).

## *Granular starch binding assays*

Granular starch-binding assays were conducted with potato starch (Bob's Red Mill), corn starch (Sigma), wheat starch (Sigma), or Avicel (Fluka). Prior to use, all polysaccharides were washed 3x with an excess of assay buffer (20mM HEPES pH 7.0, 100mM NaCl) to remove soluble starch and oligosaccharides and prepared as a 50mg/mL slurry. 1mg (corn) or 5mg (potato) of starch slurry was aliquoted into 0.2mL tubes in triplicate, centrifuged at 2,000xg for 2 min and the supernatant was carefully removed. 100μL of protein ranging from 0.5μM-10μM protein was added to each starch and the tubes were agitated by end-over-end rotation at room temperature for 1hr. After centrifugation at 2,000xg for 2min, 20μL of the supernatant was removed for unbound protein concentration determination by absorbance at A280 using a ThermoFisher NanodropOne with three replicate measurements per sample. The remaining 80μL of supernatant was removed and set aside for SDS-PAGE gel analysis. The concentration of unbound protein remaining in the supernatant was used to determine the μmoles of protein bound per gram of starch which was plotted against the concentration of initial (free) protein to generate a binding curve [31]. Overall affinity ( $K_d$ ) and binding maximum ( $B_{max}$ ) was determined via a one-site binding model (specific binding) using GraphPad Prism version 9.2.0 for Windows (GraphPad Software, San Diego, California USA, [www.graphpad.com](http://www.graphpad.com)) [31].

To assess the remaining starch granules for bound protein, the granules were washed three times with an excess of assay buffer by mixing and centrifugation, the final wash supernatant was removed, and 100μL of Laemmli buffer containing 1M urea was added to the starch pellet to denature any bound protein but keep the original volume consistent. To qualitatively determine the amount of unbound and bound protein, 10μL each of the wash supernatant and solubilized pellet fraction were run separately via SDS-PAGE. Bovine serum albumin was used as a negative control and to confirm unbound protein was sufficiently washed from the starch granules.

## *Polysaccharide Affinity PAGE*

Non-denaturing polyacrylamide gels with and without potato amylopectin (Sigma), corn amylopectin (Sigma), potato amylose (Sigma), bovine liver glycogen (Sigma), pullulan (Sigma), or dextran (Sigma) to a final concentration of 0.1% polysaccharide were cast. All polysaccharides were autoclaved and amylose was solubilized by alkaline solubilization with 1M NaOH and acid neutralization to pH 7 with HCl [60]. Sas6 protein samples were mixed with 6X loading dye lacking SDS. Gels were run concurrently for 4 hours on ice and subsequently stained with Coomassie (0.025% Coomassie blue R350, 10% acetic acid, and 45% methanol). Gels were imaged on a Bio-Rad Gel Doc Go imaging system. The distance between each band and the top of the separating gel were measured using ImageJ [61]. The ratio of the distance migrated by each band was determined to the distance the BSA band traveled. Binding was considered positive if the ratio was less 0.85 as previously described [62].

## *Isothermal Titration Calorimetry*

All ITC experiments were carried out using a TA Instruments standard volume NanoITC. For each experiment, 1300μL of 25μM protein was added to the sample cell and the reference cell was filled with distilled water. The sample injection syringe was loaded with 250μL of the appropriate ligand concentration (0.5mM - 5mM) to fully saturate the protein by the end of 25 injections of 10μls. Titrations were performed at 25°C with a stirring speed of 250 rpm. The resulting data were modeled using TA Instruments NanoAnalyze software employing the pre-set models for independent binding and blank (constant) to subtract the heat of dilution. For interactions with high affinity (c-value at 25μM protein greater than 5), no alterations were made to the model. If the calculated c value of an interaction fell below 5, the n value was set to 1 as indicated in the figure legend following the guidance for modeling low affinity interactions [63]. For polysaccharide titrations, curves were modeled by varying the substrate concentration until n=1 such that the  $K_d$  represents the overall affinity for the construct [52].

673

## 674 *Protein Crystallization*

675 Crystallization conditions for  $\alpha$ -cyclodextrin (2mM) bound (pdb 7UWW) and unliganded (pdb  
676 7UWU) crystals of Sas6T were screened via 96-well sparse matrix screen (Peg Ion HT, Hampton  
677 Research #HR2-139) in a sitting drop vapor diffusion experiment at room temperature. Screens  
678 were set up using an Art Robbins Gryphon robot with 20mg/mL protein in a 3-well tray (Art  
679 Robbins #102-0001-13) using protein-to-well solution ratios of 2:1, 1:1, and 1:2. Small crystals  
680 were observed in 0.2M Potassium thiocyanate pH 7.0, 20% w/v Polyethylene glycol 3,350  
681 (condition B2) and were further optimized by varying pH, PEG 3350 percentage, and potassium  
682 thiocyanate concentration. Crystals were microseeded with a crystal seeding tool (Hampton) in a  
683 sitting drop setup of 1.5 $\mu$ L drops with 2:1, 1:1, or 1:2 protein:well solution ratios. The optimal  
684 crystallization solution contained 0.3M Potassium thiocyanate pH 7.0, 24% PEG 3350 and 1mM  
685 Anderson–Evans polyoxotungstate [TeW<sub>6</sub>O<sub>24</sub>]<sup>6-</sup> (TEW) (Jena Biosciences #X-TEW-5) to improve  
686 crystal diffraction. Prior to data collection, crystals were cryoprotected in a mixture of 80%  
687 crystallization solution supplemented with 20% ethylene glycol then plunged into liquid nitrogen.

688 Crystallization conditions for maltodecaose-bound RbCBM74 structure (pdb 7UWV) were  
689 generated from the construct lacking the CBM26 domain (Blg-RbCBM74-Blg, residues 134-665)  
690 using 96-well sparse matrix screens. A crystalline mass observed in 60% v/v Tacsimate pH 7.0,  
691 0.1 M BIS-TRIS propane pH 7.0 (Hampton Salt-Rx HT-well H12 #HR2-136) was used to  
692 microseed an optimized solution containing 30% Tacsimate, 0.1M HEPES pH 7.0 and 2mM  
693 maltodecaose (CarboExpert). No additional cryo-protection was required prior to plunge freezing  
694 into liquid nitrogen.

695

## 696 *Structure Determination and Refinement*

697 X-ray data were collected at the Life Sciences Collaborative Access Team (LS-CAT) at Argonne  
698 National Laboratory's Advanced Photon Source (APS) in Argonne, IL. Data were processed at

APS using autoPROC with XDS for spot finding, indexing, and integration followed by Aimless for scaling and merging [64-66]. Intrinsic sulfur SAD phasing was used to determine the structure of Sas6T/ $\alpha$ -cyclodextrin (7UWW) using AutoSol in Phenix [67, 68]. Those coordinates were then used for molecular replacement in Phaser to determine the unliganded Sas6T (7UWU) and Blg-*RbCBM74*-Blg/G10 (7UWV) structures [69]. All three structures were refined via manual model building in Coot and refinement in Phenix.refine [70, 71]. Metal ion identities were validated using the web-based CheckMyMetal (CMM) tool [72] (<https://cmm.minorlab.org/>). Carbohydrate models were validated using Privateer [73].

#### *SEC-SAXS experiment*

SAXS was performed at Biophysics Collaborative Access Team (BioCAT, beamline 18ID at APS) with in-line size exclusion chromatography (SEC-SAXS) to separate the sample from aggregates and other contaminants. Sample was loaded onto a Superdex 200 Increase 10/300 GL column (Cytiva), which was run at 0.6ml/min by an AKTA Pure FPLC (GE) and the eluate after it passed through the UV monitor was flown through the SAXS flow cell. The flow cell consists of a 1.0mm ID quartz capillary with  $\sim 20\mu\text{m}$  walls. A coflowing buffer sheath is used to separate the sample from the capillary walls, helping prevent radiation damage [74]. Scattering intensity was recorded using a Pilatus3 X 1M (Dectris) detector which was placed 3.6m from the sample giving a  $q$ -range of  $0.003\text{\AA}^{-1}$  to  $0.35\text{\AA}^{-1}$ . 0.7 s exposures were acquired every 1s during elution and data was reduced using BioXTAS RAW 2.1.1 [75]. Within RAW, the Volume of Correlation ( $V_c$ ), molecular weight, and oligomeric state were determined [76, 77]. Buffer blanks were created by averaging regions flanking the elution peak and subtracted from exposures selected from the elution peak to create the  $I(q)$  vs  $q$  curves used for subsequent analyses. The molecular weight was calculated by comparison to known structures (Shape&Size) [38].  $P(r)$  function was determined using GNOM [39]. GNOM and Shape&Size are part of the ATSAS package (version 3.0) [78]. High resolution

structures were fit to the SAXS data using FoXS and flexibility in the high-resolution structures was modeled against the Multi-FoXS data [40]. **Tables S2A-C** list sample, instrumentation, and software for the SEC-SAXS experiment.

# *Hydrogen–Deuterium eXchange Mass Spectrometry (HDX-MS)*

HDX-MS experiments were performed using a Synapt G2-SX HDMS system (Waters), similar to previously reported [79]. Deuteration reactions were incubated at 20°C for 15s, 150s, 1500s, and 15,000s in triplicate. 3μL of Blg-*RbCBM74*-Blg alone or in the presence of G10 were diluted with 57μL of deuterated labeling buffer. Nondeuterated data were acquired by dilution with protonated buffer and fully deuterated data were prepared by dilution in 99% D<sub>2</sub>O, 1% (v/v) formic acid) for 48h at room temperature. Samples were measured in triplicate using automated handling with a PAL liquid handling system (LEAP), using randomized sequential collection with Chronos.

Following incubation, deuteration was quenched by mixing 50μL of the solution with 50μL of 100mM phosphate, pH 2.5 at 0.3°C. Immediately after the samples were quenched, 95μL of the sample was loaded onto an Acquity M-class UPLC (Waters) with sequential inline pepsin digestion (Waters Enzymate BEH Pepsin column, 2.1mm × 30mm) for 3min at 15°C followed by reverse phase purification (Acquity UPLC BEH C18 1.7μm at 0.2°C). Sample was loaded onto the column equilibrated with 95% water, 5% acetonitrile, and 0.1% formic acid at a flow rate of 40μL/min. A 7min linear gradient (5%–35% acetonitrile) followed by a ramp and 2min block (85% acetonitrile) was used for separation and directly continuously infused onto a Synapt XS using Ion Mobility (Waters). [Glu1]-Fibrinopeptide B was used as a reference.

Data from nondeuterated samples were used for peptide identification with ProteinLynx Global Server 3.0 (Waters). Full coverage of the protein was obtained, with the exception of the region from residues 289-296, where peptides were not detected. The filtered peptide list and MS data were imported into HDExaminer (Sierra Analytics) for deuterium uptake calculation using both retention time and mobility matching. Representative peptides were utilized for a final



cumulative sequence coverage of 91.4%. Normalized deuterium uptake data was calculated for protein alone and with G10, and differential protection, defined as those regions with an average of 5% difference in deuteration between states over the 150-15000s timepoints, were mapped onto the crystal structure using PyMOL (Schrodinger).

### *Native Mass Spectrometry (MS)*

Stock solutions of Blg-*RbCBM74*-Blg and Sas6 were de-salted and solvent exchanged into 200mM ammonium acetate (pH 6.8 – 7.0) using Amicon Ultra-0.5mL centrifugal filters (MilliporeSigma) with a 10kDa molecular weight cut-off. Ten consecutive washing steps were performed to achieve sufficient desalting. The final concentrations of each protein stock solution after desalting were estimated via UV absorbance at 280nm. A stock solution of G10 was prepared by dissolving a known mass in 200mM ammonium acetate to achieve a final concentration of 200μM. For native MS titration experiments used to quantify  $K_d$  values, the concentration of protein was fixed at 5μM, and enough G10 was added to achieve final concentrations of 0, 5, 25, 50, 100, and 150μM. Protein-G10 mixtures were then incubated at 4°C overnight to achieve equilibration prior to native MS analysis.

All native binding experiments were performed using a Q Exactive Orbitrap MS with Ultra High Mass Range (UHMR) platform (Thermo Fisher Scientific) [80]. Each sample (~3μM) was transferred to a gold-coated borosilicate capillary needle (prepared in house), and ions were generated via direct infusion using a nano-electrospray ionization (nESI) source operated in positive mode. The capillary voltage was held at 1.2kV, the inlet capillary was heated to 250°C, and the S-lens RF level was kept at 80. Low  $m/z$  detector optimization and high  $m/z$  transfer optics were used, and the trapping gas pressure was set to 2. In-source trapping was enabled with the desolvation voltage fixed at -25V for improved ion transmission and efficient salt adduct removal. Transient times were set at 128ms (resolution of 25,000 at  $m/z$  400), and 5 microscans were combined into a single scan. A total of ~50 scans were averaged to produce the presented mass



spectra. All full scan data were acquired using a noise threshold of 0 to avoid pre-processing of mass spectra. A total of three measurements for each ligand concentration were performed. Data were then processed and deconvoluted using UniDec software [81].

# *K<sub>d</sub> Measurements by Native MS.*

We performed titration experiments for both Blg-*Rb*CBM74-Blg and Sas6T using G10 and acquired modeled titration curves. Each bound state differed by ~1639 Da, which agrees with the theoretical mass of G10. To obtain the binding constants, we summed the peak intensities of all abundant charge states in our mass spectra. *K<sub>d</sub>* values were calculated using the relative intensities of unbound protein and each ligand bound species from the mass spectra as previously described [82]. Briefly, the protein-ligand binding equilibrium of Blg-*Rb*CBM74-Blg with G10 in solution can be described by the following reversible reaction:

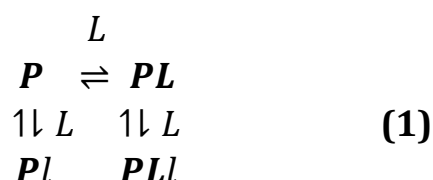

where *L* is the ligand and *P* and *PL* are the free protein and protein with one specifically bound ligand, respectively. Blg-*Rb*CBM74-Blg possesses one ligand-binding site, *Rb*CBM74. As the concentration of ligand is increased, ligand molecules can bind nonspecifically during the nESI process, generating artifactual peaks in the mass spectra corresponding to a two ligand-bound complex. As the concentration of ligand is increased, ligand molecules can bind nonspecifically during the nESI process, generating artifactual peaks in the mass spectra corresponding to a two ligand-bound complex. Here, we presume that nonspecific binding arises equally for free protein and that which possesses one specifically bound ligand represented by *Pl* and *PLl* in Eq. 1. Based on these assumptions, the equations of mass balance and binding states can be described the following system of equations:

$$c_p = [P] + ([PL] + [Pl]) + [PLL] \quad (2a)$$

$$c_L = [L] + ([PL] + [Pl]) + 2[PLL] \quad (2b)$$

$$K_d = \frac{[P][L]}{[PL]} \quad (2c)$$

$$K_n = \frac{[P][L]}{[Pl]} = \frac{[PL][L]}{[PLL]} \quad (2d)$$

where  $c_p$  and  $c_L$  represent the total concentrations of protein and ligand, respectively, and concentrations in brackets represent those at equilibrium.  $K_d$  and  $K_n$  represent the dissociation constants for specific and nonspecific binding steps, respectively. If 1) the peak intensities of free protein and ligand-bound complexes are proportional to the abundances of those in solution and 2) the spray and detection efficiency of all species is the same, then the fractional intensities of each species can be determined:

$$F_i = \frac{\sum_n I(PL_i^{n+})/n}{\sum_{i=0}^2 \sum_n (PL_i^{n+})/n} \quad (3)$$

Here, the fractional intensities are calculated as the sum of the intensities of main peak ions at all charge states. Since a Fourier transform MS method is utilized, signal intensities are proportional to both ion abundance and charge state. Therefore, the ion intensities are normalized for each charge state,  $n$  [83, 84]. These fractional intensities can be calculated from the titration experiment at each ligand concentration and can then be related to the equilibrium constants:

$$F_0 = \frac{K_d K_n}{K_d K_n + [L](K_d + K_n) + [L]^2} \quad (4a)$$

$$F_1 = \frac{[L](K_d + K_n)}{K_d K_n + [L](K_d + K_n) + [L]^2} \quad (4b)$$

$$F_2 = \frac{[L]^2}{K_d K_n + [L](K_d + K_n) + [L]^2} \quad (4c)$$

[L] can also be determined from nESI-MS titration data:

$$[L] = c_L - c_P(F_1 + 2F_2) \quad (5)$$

[L] was then obtained at each ligand concentration and applied to the Eqs. 4a-c. Equations 4a-b were then fitted to experimental fractional intensities using nonlinear least-squares curve fitting using the *lsqnonlin.m* function in MATLAB. A more detailed derivation of these equations is provided elsewhere [82], along with the approach utilized for Sas6 which possesses two sites for specific binding (*RbCBM74* and *RbCBM26*) and exhibits a third nonspecific bound state as shown in Eq. 6.

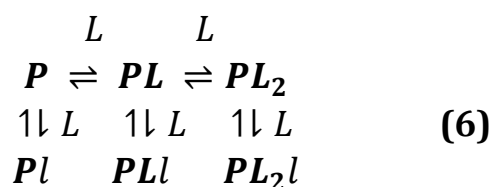

### Sequence collection

Amino acid sequences of CBM74 modules were collected according to information in the CAZy database (<http://www.cazy.org/>) yielding 29 sequences (CAZy update: March 2022) [85]. This set was subsequently completed with sequences of hypothetical CBM74s based on protein BLAST searches (<https://blast.ncbi.nlm.nih.gov/Blast.cgi>) using the CBM74 sequences from Sas6 of *Ruminococcus bromii* (GenBank Acc. No.: PKD32096.1) and the GH13\_32  $\alpha$ -amylase from *Microbacterium aurum* (GenBank Acc. No.: AKG25402.1) as queries [20, 86, 87]. In total, three searches with each query sequence were performed, limiting the searched databases to taxonomy kingdoms of Bacteria, Archaea and Eucarya (with no relevant results for the latter two). To capture a wide spectrum of organisms harboring a CBM74 module, one non-redundant amino acid sequence was selected to represent each species and/or bacterial strain. The BLAST

searches thus yielded 93 additional CBM74 sequences of bacterial origin; the last sequence taken being the CBM74 module of a putative  $\alpha$ -amylase from uncultured *Eubacterium* sp. (GenBank: SCJ65691.1; E-value: 3e-39). That preliminary set of 122 sequences was reduced by eliminating 23 sequences due to their redundancy and/or incompleteness of the CBM74 module. The final set of CBM74 modules consisted of 99 sequences (**Extended Data Table 2**). All sequences were retrieved from the GenBank (<https://www.ncbi.nlm.nih.gov/genbank/>) and/or UniProt (<https://www.uniprot.org/>) databases [88, 89].

### *Sequence comparison and evolutionary analysis*

The alignment of 99 CBM74 modules from the final set was performed using the program Clustal-Omega (<https://www.ebi.ac.uk/Tools/msa/clustalo/>) [90]. Only a subtle manual tuning of the computer-produced alignment was necessary to perform to maximize sequence similarities. The evolutionary tree of these 99 sequences was calculated by a maximum-likelihood method (on the final alignment including the gaps) using the WAG substitution model and the bootstrapping procedure with 500 bootstrap trials implemented in the MEGA-X package [91-93]. The calculated tree file was displayed with the program iTOL [94] (<https://itol.embl.de/>). From both the alignment and the tree of all 99 sequences, a sample of 33 representative CBM74s was selected for a simplified alignment and tree. The structural comparison was created using the above-mentioned alignment in conjunction with the web-based CONSURF tool [54-56].

### *Data availability*

The X-ray structures and diffraction data reported in this paper have been deposited in the Protein Data Bank under the accession codes 7UWU, 7UWV and 7UWW. The SAXS data are deposited in the small angle x-ray scattering database (SASDB) under the accession code SASDPE2 [95]. All mass spectrometry data will be made available upon request.

886

## 887 **Funding and acknowledgements**

888 This work is primarily supported by a Ruth L. Kirschstein National Research Service Award  
 889 Individual Predoctoral Fellowship (F31 – F31AT011282 to A.L.P.) from the National Center for  
 890 Complementary & Integrative Health (NCCIH) and a Research Program Project grant (P01-  
 891 HL149633 to N.M.K.) from the National Heart, Lung, and Blood Institute (NHLBI) of the National  
 892 Institutes of Health (NIH). Next-generation Native Mass Spectrometry technologies were  
 893 supported by National Institute of General Medical Sciences (NIGMS) of the NIH (R01-GM095832  
 894 to B.T.R.). Hydrogen-Deuterium exchange mass spectrometry acquisition was supported by  
 895 National Science Foundation (NSF) (DBI 2018007 to C.W.V.K.). The structural biology  
 896 approaches herein used resources of the Advanced Photon Source; a U.S. Department of Energy  
 897 (DOE) Office of Science User Facility operated for the DOE Office of Science by Argonne National  
 898 Laboratory under Contract No. DE-AC02-06CH11357. The Biophysics Collaborative Access  
 899 Team is supported by P30-GM138395 from NIGMS-NIH. Use of the Pilatus 3 1M detector was  
 900 provided by Grant 1S10OD018090-01 from NIGMS-NIH. Use of the LS-CAT Sector 21 was  
 901 supported by the Michigan Economic Development Corporation and the Michigan Technology  
 902 Tri-Corridor (Grant 085P1000817). S.J. and F.M. thank the Slovak Grant Agency VEGA for the  
 903 financial support by the Grant No. 2/0146/21. In collaboration with this research, we acknowledge  
 904 support from the University of Michigan Biomedical Research Core Facilities Light Microscopy  
 905 Core. For the native mass spectrometry work, we would like to acknowledge the Biological Mass  
 906 Spectrometry facility at the University of Michigan Department of Chemistry. The content is solely  
 907 the responsibility of the authors and does not necessarily represent the official views of VEGA,  
 908 the National Science Foundation, or National Institutes of Health.

909

## 910 **Author contributions**

911 N.M.K. and A.L.P. conceptualization;  
 912 A.L.P., F.M.C., R. V-V., K.M.A., F.M., T.C., Z.W., J.H., C.W.V.K, S.J., B.T.R., and N.M.K. data  
 913 curation;  
 914 A.L.P., F.M.C., R.V-V., K.M.A., F.M., T.C., Z.W., J.H., C.W.V.K, S.J., B.T.R., and N.M.K. formal  
 915 analysis and data interpretation;  
 916 N.M.K., A.L.P., C.W.V.K, S.J., B.T.R., Z.W., and J.H. funding acquisition;  
 917 A.L.P., F.M.C., R. V-V., K.M.A., F.M., T.C., Z.W., J.H., C.W.V.K, and S.J. investigation;  
 918 A.L.P., F.M.C., R. V-V., K.M.A., F.M., T.C., Z.W., J.H., C.W.V.K, S.J., B.T.R., and N.M.K.  
 919 methodology;  
 920 A.L.P., F.M.C., R.V-V., C.W.V.K , S.J. and N.M.K original draft;  
 921 A.L.P., F.M.C., R.V-V., F.M., J.H., C.W.V.K, S.J., B.T.R., and N.M.K. writing- review and editing;  
 922 N.M.K., J.H., C.W.V.K, S.J., and B.T.R. supervision;  
 923 A.L.P., F.M.C., R.V-V., T.C., and S.J. visualization.

924

## 925 **Conflict of interest**

926 The authors declare that they have no conflicts of interest with the contents of this article.

927

1. Salminen, S., E. Isolauri, and T. Onnela, *Gut Flora in Normal and Disordered States*. Chemotherapy, 1995. **41(suppl 1)**(Suppl. 1): p. 5-15.
2. Gibson, G.R. and M.B. Roberfroid, *Dietary modulation of the human colonic microbiota: introducing the concept of prebiotics*. J Nutr, 1995. **125**(6): p. 1401-12.
3. Cummings, J.H. and G.T. Macfarlane, *The control and consequences of bacterial fermentation in the human colon*. J Appl Bacteriol, 1991. **70**(6): p. 443-59.
4. Backhed, F., et al., *Host-bacterial mutualism in the human intestine*. Science, 2005. **307**(5717): p. 1915-20.
5. Wu, X., et al., *Effects of the intestinal microbial metabolite butyrate on the development of colorectal cancer*. J Cancer, 2018. **9**(14): p. 2510-2517.
6. Zaman, S.A. and S.R. Sarbini, *The potential of resistant starch as a prebiotic*. Critical Reviews in Biotechnology, 2016. **36**(3): p. 578-584.
7. Bertoft, E., *Understanding Starch Structure: Recent Progress*. 2017. **7**(3): p. 56.
8. Pérez, S. and E. Bertoft, *The molecular structures of starch components and their contribution to the architecture of starch granules: A comprehensive review*. 2010. **62**(8): p. 389-420.
9. Cerqueira, F.M., et al., *Starch Digestion by Gut Bacteria: Crowdsourcing for Carbs*. Trends Microbiol, 2020. **28**(2): p. 95-108.
10. Ze, X., et al., *Ruminococcus bromii is a keystone species for the degradation of resistant starch in the human colon*. ISME J, 2012. **6**(8): p. 1535-43.
11. Jung, D.H., et al., *Bifidobacterium adolescentis P2P3, a Human Gut Bacterium Having Strong Non-Gelatinized Resistant Starch-Degrading Activity*. J Microbiol Biotechnol, 2019. **29**(12): p. 1904-1915.
12. Teichmann, J. and D.W. Cockburn, *In vitro Fermentation Reveals Changes in Butyrate Production Dependent on Resistant Starch Source and Microbiome Composition*. 2021. **12**(976).
13. Duranti, S., et al., *Genomic characterization and transcriptional studies of the starch-utilizing strain Bifidobacterium adolescentis 22L*. Appl Environ Microbiol, 2014. **80**(19): p. 6080-90.
14. Belenguer, A., et al., *Two routes of metabolic cross-feeding between Bifidobacterium adolescentis and butyrate-producing anaerobes from the human gut*. Appl Environ Microbiol, 2006. **72**(5): p. 3593-9.
15. Venkataraman, A., et al., *Variable responses of human microbiomes to dietary supplementation with resistant starch*. Microbiome, 2016. **4**(1): p. 33.
16. Baxter, N.T., et al., *Dynamics of Human Gut Microbiota and Short-Chain Fatty Acids in Response to Dietary Interventions with Three Fermentable Fibers*. MBio, 2019. **10**(1).
17. Ze, X., et al., *Unique Organization of Extracellular Amylases into Amylosomes in the Resistant Starch-Utilizing Human Colonic Firmicutes Bacterium Ruminococcus bromii*. mBio, 2015. **6**(5): p. e01058-15.
18. Smith, S.P. and E.A. Bayer, *Insights into cellulosome assembly and dynamics: from dissection to reconstruction of the supramolecular enzyme complex*. Curr Opin Struct Biol, 2013. **23**(5): p. 686-94.
19. Bayer, E.A., E. Morag, and R. Lamed, *The cellulosome--a treasure-trove for biotechnology*. Trends Biotechnol, 1994. **12**(9): p. 379-86.
20. Mukhopadhyay, I., et al., *Sporulation capability and amylosome conservation among diverse human colonic and rumen isolates of the keystone starch-degrader Ruminococcus bromii*. Environ Microbiol, 2018. **20**(1): p. 324-336.
21. Janecek, S., et al., *Starch-binding domains as CBM families-history, occurrence, structure, function and evolution*. Biotechnol Adv, 2019. **37**(8): p. 107451.



- 978 22. Valk, V., et al., *Carbohydrate-binding module 74 is a novel starch-binding domain*  
979 *associated with large and multidomain alpha-amylase enzymes*. FEBS J, 2016. **283**(12):  
980 p. 2354-68.
- 981 23. Dobranowski, P.A. and A. Stintzi, *Resistant starch, microbiome, and precision modulation*.  
982 Gut Microbes, 2021. **13**(1): p. 1926842.
- 983 24. Ravi, A., et al., *Hybrid metagenome assemblies link carbohydrate structure with function*  
984 *in the human gut microbiome*. Communications Biology, 2022. **5**(1): p. 932.
- 985 25. Xu, J., et al., *Metatranscriptomic analysis of colonic microbiota's functional response to*  
986 *different dietary fibers in growing pigs*. Animal Microbiome, 2021. **3**(1): p. 45.
- 987 26. Zhang, H., et al., *dbCAN2: a meta server for automated carbohydrate-active enzyme*  
988 *annotation*. Nucleic Acids Research, 2018. **46**(W1): p. W95-W101.
- 989 27. Lombard, V., et al., *The carbohydrate-active enzymes database (CAZy) in 2013*. Nucleic  
990 Acids Res, 2014. **42**(Database issue): p. D490-5.
- 991 28. Blum, M., et al., *The InterPro protein families and domains database: 20 years on*. Nucleic  
992 Acids Res, 2021. **49**(D1): p. D344-D354.
- 993 29. Cerqueira, F.M., et al., *Sas20 is a highly flexible starch-binding protein in the*  
994 *Ruminococcus bromii cell-surface amylosome*. J Biol Chem, 2022: p. 101896.
- 995 30. Fontes, C.M. and H.J. Gilbert, *Cellulosomes: highly efficient nanomachines designed to*  
996 *deconstruct plant cell wall complex carbohydrates*. Annu Rev Biochem, 2010. **79**: p. 655-  
997 81.
- 998 31. Boraston, A.B., et al., *A structural and functional analysis of alpha-glucan recognition by*  
999 *family 25 and 26 carbohydrate-binding modules reveals a conserved mode of starch*  
1000 *recognition*. J Biol Chem, 2006. **281**(1): p. 587-98.
- 1001 32. Matsui, M., M. Kakuta, and A. Misaki, *Comparison of the Unit-chain Distributions of*  
1002 *Glycogens from Different Biological Sources, Revealed by Anion Exchange*  
1003 *Chromatography*. Bioscience, Biotechnology, and Biochemistry, 1993. **57**(4): p. 623-627.
- 1004 33. Brewer, M.K. and M.S. Gentry, *Brain Glycogen Structure and Its Associated Proteins:*  
1005 *Past, Present and Future*. Adv Neurobiol, 2019. **23**: p. 17-81.
- 1006 34. Singh, R.S., G.K. Saini, and J.F. Kennedy, *Pullulan: Microbial sources, production and*  
1007 *applications*. Carbohydr Polym, 2008. **73**(4): p. 515-31.
- 1008 35. Khalikova, E., P. Susi, and T. Korpela, *Microbial dextran-hydrolyzing enzymes:*  
1009 *fundamentals and applications*. Microbiol Mol Biol Rev, 2005. **69**(2): p. 306-25.
- 1010 36. Valk, V., M.v.d.K. Rachel, and L. Dijkhuizen, *The evolutionary origin and possible*  
1011 *functional roles of FNIII domains in two Microbacterium aurum B8.A granular starch*  
1012 *degrading enzymes, and in other carbohydrate acting enzymes*. Amylase, 2017. **1**(1): p.  
1013 1-11.
- 1014 37. Krissinel, E. and K. Henrick, *Inference of macromolecular assemblies from crystalline*  
1015 *state*. J Mol Biol, 2007. **372**(3): p. 774-97.
- 1016 38. Franke, D., C.M. Jeffries, and D.I. Svergun, *Machine Learning Methods for X-Ray*  
1017 *Scattering Data Analysis from Biomacromolecular Solutions*. Biophysical Journal, 2018.  
1018 **114**(11): p. 2485-2492.
- 1019 39. Svergun, D., *Determination of the regularization parameter in indirect-transform methods*  
1020 *using perceptual criteria*. Journal of Applied Crystallography, 1992. **25**(4): p. 495-503.
- 1021 40. Schneidman-Duhovny, D., et al., *FoXS, FoXSDock and MultiFoXS: Single-state and multi-*  
1022 *state structural modeling of proteins and their complexes based on SAXS profiles*. Nucleic  
1023 Acids Res, 2016. **44**(W1): p. W424-9.
- 1024 41. Holm, L., *Using Dali for Protein Structure Comparison*. Methods Mol Biol, 2020. **2112**: p.  
1025 29-42.
- 1026 42. Notenboom, V., et al., *Crystal structures of the family 9 carbohydrate-binding module from*  
1027 *Thermotoga maritima xylanase 10A in native and ligand-bound forms*. Biochemistry, 2001.  
1028 **40**(21): p. 6248-56.



- 1029 43. Milles, L.F., et al., *Calcium stabilizes the strongest protein fold*. Nat Commun, 2018. **9**(1):  
1030 p. 4764.
- 1031 44. Zheng, H., et al., *CheckMyMetal: a macromolecular metal-binding validation tool*. Acta  
1032 Crystallogr D Struct Biol, 2017. **73**(Pt 3): p. 223-233.
- 1033 45. Strynadka, N.C.J. and M.N.G. James, *Towards an understanding of the effects of calcium*  
1034 *on protein structure and function*. Current Opinion in Structural Biology, 1991. **1**(6): p. 905-  
1035 914.
- 1036 46. Holm, L., *DALI and the persistence of protein shape*. 2020. **29**(1): p. 128-140.
- 1037 47. Rodriguez-Sanoja, R., et al., *A single residue mutation abolishes attachment of the*  
1038 *CBM26 starch-binding domain from Lactobacillus amylovorus alpha-amylase*. J Ind  
1039 Microbiol Biotechnol, 2009. **36**(3): p. 341-6.
- 1040 48. Baldwin, P.M., M.C. Davies, and C.D. Melia, *Starch granule surface imaging using low-*  
1041 *voltage scanning electron microscopy and atomic force microscopy*. Int J Biol Macromol,  
1042 1997. **21**(1-2): p. 103-7.
- 1043 49. Szymonska, J. and F. Krok, *Potato starch granule nanostructure studied by high resolution*  
1044 *non-contact AFM*. Int J Biol Macromol, 2003. **33**(1-3): p. 1-7.
- 1045 50. Park, H., S. Xu, and K. Seetharaman, *A novel in situ atomic force microscopy imaging*  
1046 *technique to probe surface morphological features of starch granules*. Carbohydr Res,  
1047 2011. **346**(6): p. 847-53.
- 1048 51. Lineback, D.R., *Current Concepts of Starch Structure and Its Impact on Properties*.  
1049 Journal of the Japanese Society of Starch Science, 1986. **33**(1): p. 80-88.
- 1050 52. Abbott, D.W. and A.B. Boraston, *Chapter eleven - Quantitative Approaches to The*  
1051 *Analysis of Carbohydrate-Binding Module Function*, in *Methods in Enzymology*, H.J.  
1052 Gilbert, Editor. 2012, Academic Press. p. 211-231.
- 1053 53. Soper, M.T., et al., *Amyloid-beta-neuropeptide interactions assessed by ion mobility-mass*  
1054 *spectrometry*. Phys Chem Chem Phys, 2013. **15**(23): p. 8952-61.
- 1055 54. Ashkenazy, H., et al., *ConSurf 2016: an improved methodology to estimate and visualize*  
1056 *evolutionary conservation in macromolecules*. Nucleic Acids Res, 2016. **44**(W1): p. W344-  
1057 50.
- 1058 55. Ashkenazy, H., et al., *ConSurf 2010: calculating evolutionary conservation in sequence*  
1059 *and structure of proteins and nucleic acids*. Nucleic Acids Res, 2010. **38**(Web Server  
1060 issue): p. W529-33.
- 1061 56. Celnikier, G., et al., *ConSurf: Using Evolutionary Data to Raise Testable Hypotheses about*  
1062 *Protein Function*. 2013. **53**(3-4): p. 199-206.
- 1063 57. Jung, D.H., et al., *The presence of resistant starch-degrading amylases in Bifidobacterium*  
1064 *adolescentis of the human gut*. Int J Biol Macromol, 2020. **161**: p. 389-397.
- 1065 58. Rees, D.A. and E.J. Welsh, *Secondary and Tertiary Structure of Polysaccharides in*  
1066 *Solutions and Gels*. 1977. **16**(4): p. 214-224.
- 1067 59. Cameron, E.A., et al., *Multidomain Carbohydrate-binding Proteins Involved in Bacteroides*  
1068 *thetaiotaomicron Starch Metabolism*. J Biol Chem, 2012. **287**(41): p. 34614-25.
- 1069 60. Hillmann, G., *Measurement by End-point Determination on Paper*, in *Methods of*  
1070 *Enzymatic Analysis (Second Edition)*, H.U. Bergmeyer, Editor. 1974, Academic Press. p.  
1071 903-909.
- 1072 61. Schneider, C.A., W.S. Rasband, and K.W. Eliceiri, *NIH Image to ImageJ: 25 years of*  
1073 *image analysis*. Nature Methods, 2012. **9**(7): p. 671-675.
- 1074 62. Cockburn, D.W., et al., *Novel carbohydrate binding modules in the surface anchored*  
1075 *alpha-amylase of Eubacterium rectale provide a molecular rationale for the range of*  
1076 *starches used by this organism in the human gut*. Mol Microbiol, 2018. **107**(2): p. 249-264.
- 1077 63. Turnbull, W.B. and A.H. Daranas, *On the value of c: can low affinity systems be studied*  
1078 *by isothermal titration calorimetry?* J Am Chem Soc, 2003. **125**(48): p. 14859-66.

64. Vonnrhein, C., et al., *Data processing and analysis with the autoPROC toolbox*. Acta Crystallographica Section D, 2011. **67**(4): p. 293-302.
65. Kabsch, W., Xds. Acta Crystallogr D Biol Crystallogr, 2010. **66**(Pt 2): p. 125-32.
66. Evans, P.R. and G.N. Murshudov, *How good are my data and what is the resolution?* Acta Crystallogr D Biol Crystallogr, 2013. **69**(Pt 7): p. 1204-14.
67. El Omari, K., et al., *Pushing the limits of sulfur SAD phasing: de novo structure solution of the N-terminal domain of the ectodomain of HCV E1*. Acta Crystallogr D Biol Crystallogr, 2014. **70**(Pt 8): p. 2197-203.
68. Terwilliger, T.C., et al., *Decision-making in structure solution using Bayesian estimates of map quality: the PHENIX AutoSol wizard*. Acta Crystallographica Section D, 2009. **65**(6): p. 582-601.
69. McCoy, A.J., et al., *Phaser crystallographic software*. Journal of Applied Crystallography, 2007. **40**(4): p. 658-674.
70. Emsley, P. and K. Cowtan, *Coot: model-building tools for molecular graphics*. Acta Crystallogr D Biol Crystallogr, 2004. **60**(Pt 12 Pt 1): p. 2126-32.
71. Afonine, P.V., et al., *Towards automated crystallographic structure refinement with phenix.refine*. Acta Crystallogr D Biol Crystallogr, 2012. **68**(Pt 4): p. 352-67.
72. Zheng, H., et al., *Validation of metal-binding sites in macromolecular structures with the CheckMyMetal web server*. Nat Protoc, 2014. **9**(1): p. 156-70.
73. Agirre, J., et al., *Privateer: software for the conformational validation of carbohydrate structures*. Nature Structural & Molecular Biology, 2015. **22**(11): p. 833-834.
74. Kirby, N., et al., *Improved radiation dose efficiency in solution SAXS using a sheath flow sample environment*. Acta crystallographica. Section D, Structural biology, 2016. **72**(Pt 12): p. 1254-1266.
75. Hopkins, J.B., R.E. Gillilan, and S. Skou, *BioXTAS RAW: improvements to a free open-source program for small-angle X-ray scattering data reduction and analysis*. J Appl Crystallogr, 2017. **50**(Pt 5): p. 1545-1553.
76. Rambo, R.P. and J.A. Tainer, *Accurate assessment of mass, models and resolution by small-angle scattering*. Nature, 2013. **496**(7446): p. 477-481.
77. Pliadov, V., et al., *SAXSMoW 2.0: Online calculator of the molecular weight of proteins in dilute solution from experimental SAXS data measured on a relative scale*. Protein Sci, 2019. **28**(2): p. 454-463.
78. Manalastas-Cantos, K., et al., *ATSAS 3.0: expanded functionality and new tools for small-angle scattering data analysis*. Journal of Applied Crystallography, 2021. **54**(1): p. 343-355.
79. Murphy, R.D., et al., *The Toxoplasma glucan phosphatase TgLaforin utilizes a distinct functional mechanism that can be exploited by therapeutic inhibitors*. Journal of Biological Chemistry, 2022. **298**(7): p. 102089.
80. van de Waterbeemd, M., et al., *High-fidelity mass analysis unveils heterogeneity in intact ribosomal particles*. Nature Methods, 2017. **14**(3): p. 283-286.
81. Marty, M.T., et al., *Bayesian deconvolution of mass and ion mobility spectra: from binary interactions to polydisperse ensembles*. Anal Chem, 2015. **87**(8): p. 4370-6.
82. Gulbakan, B., et al., *Native Electrospray Ionization Mass Spectrometry Reveals Multiple Facets of Aptamer-Ligand Interactions: From Mechanism to Binding Constants*. J Am Chem Soc, 2018. **140**(24): p. 7486-7497.
83. Wang, W., E.N. Kitova, and J.S. Klassen, *Influence of solution and gas phase processes on protein-carbohydrate binding affinities determined by nanoelectrospray Fourier transform ion cyclotron resonance mass spectrometry*. Anal Chem, 2003. **75**(19): p. 4945-55.
84. Báez Bolívar, E.G., et al., *Submicron Emitters Enable Reliable Quantification of Weak Protein–Glycan Interactions by ESI-MS*. Analytical Chemistry, 2021. **93**(9): p. 4231-4239.

- 1130 85. Drula, E., et al., *The carbohydrate-active enzyme database: functions and literature*.  
 1131 Nucleic Acids Res, 2022. **50**(D1): p. D571-D577.  
 1132 86. Valk, V., et al., *Degradation of Granular Starch by the Bacterium *Microbacterium aurum**  
 1133 *Strain B8.A Involves a Modular alpha-Amylase Enzyme System with FNIII and CBM25*  
 1134 *Domains*. Appl Environ Microbiol, 2015. **81**(19): p. 6610-20.  
 1135 87. Altschul, S.F., et al., *Basic local alignment search tool*. J Mol Biol, 1990. **215**(3): p. 403-  
 1136 10.  
 1137 88. Sayers, E.W., et al., *GenBank*. Nucleic Acids Res, 2021. **49**(D1): p. D92-D96.  
 1138 89. UniProt, C., *UniProt: the universal protein knowledgebase in 2021*. Nucleic Acids Res,  
 1139 2021. **49**(D1): p. D480-D489.  
 1140 90. Sievers, F., et al., *Fast, scalable generation of high-quality protein multiple sequence*  
 1141 *alignments using Clustal Omega*. Mol Syst Biol, 2011. **7**: p. 539.  
 1142 91. Whelan, S. and N. Goldman, *A general empirical model of protein evolution derived from*  
 1143 *multiple protein families using a maximum-likelihood approach*. Mol Biol Evol, 2001. **18**(5):  
 1144 p. 691-9.  
 1145 92. Felsenstein, J., *Confidence Limits on Phylogenies: An Approach Using the Bootstrap*.  
 1146 Evolution, 1985. **39**(4): p. 783-791.  
 1147 93. Kumar, S., et al., *MEGA X: Molecular Evolutionary Genetics Analysis across Computing*  
 1148 *Platforms*. Mol Biol Evol, 2018. **35**(6): p. 1547-1549.  
 1149 94. Letunic, I. and P. Bork, *Interactive Tree Of Life (iTOL): an online tool for phylogenetic tree*  
 1150 *display and annotation*. Bioinformatics, 2007. **23**(1): p. 127-8.  
 1151 95. Kikhney, A.G., et al., *SASBDB: Towards an automatically curated and validated repository*  
 1152 *for biological scattering data*. Protein Sci, 2020. **29**(1): p. 66-75.

1153

## 1154 Extended Data

**Extended Table 1A:** Average masses assigned to native mass spectrometry peaks

| P               | 0 bound (Da)  | 1 bound (Da)  | 2 bound (Da)  | 3 bound (Da)  | Av Diff. (Da) <sup>a</sup> |
|-----------------|---------------|---------------|---------------|---------------|----------------------------|
| Blg-RbCBM74-Big | 57635.3 ± 0.8 | 59274.7 ± 0.6 | 60913.8 ± 0.2 | N/A           | 1639.4 ± 0.8               |
| Sas6            | 69064.9 ± 0.6 | 70704.3 ± 0.5 | 72343.8 ± 1.8 | 73982.1 ± 0.6 | 1639.3 ± 1.0               |

<sup>a</sup>Average difference between bound states across all ligand concentrations.

**Extended Table 1B:** Binding parameters determined by Native Mass Spectrometry

| P               | Charge States | K <sub>d1</sub> (μM) | K <sub>d2</sub> (μM) | K <sub>n</sub> (μM) <sup>a</sup> | SSR <sup>b</sup> |
|-----------------|---------------|----------------------|----------------------|----------------------------------|------------------|
| Blg-RbCBM74-Big | 11+ to 14+    | 3.8 ± 0.5            | N/A                  | 1154.4 ± 378.0                   | 0.0111           |
| Sas6            | 13+ to 15+    | 3.4 ± 0.5            | 165.6 ± 38.8         | 782.6 ± 647.9                    | 0.0170           |

<sup>a</sup>K<sub>n</sub> - dissociation constant for nonspecific binding step during nESI. Values reported with 95% confidence interval.

<sup>b</sup>SSR - sum of squared residuals

1155

1156

Extended Table 2: List of 99 selected CBM74 sequences.\*

| No. | Protein | Subfamily | Source material                                                                           | Source organism                                 | GenBank       | UniProt        | Length | CBM74    | Additional CBMs* | Additional CBMs**  |
|-----|---------|-----------|-------------------------------------------------------------------------------------------|-------------------------------------------------|---------------|----------------|--------|----------|------------------|--------------------|
| 1.  | pAAMY   | GHI3_28   | Koran adult feces (HG)                                                                    | <i>Bifidobacterium adolescentis</i>             | AZH171984.1   | A0A0809K2S0    | 1462   | 657978   | 2x CBM25; CBM26  | -                  |
| 2.  | pAAMY   | GHI3_28   | Human feces (HG)                                                                          | <i>Bifidobacterium adolescentis</i>             | AJ066470.1    | A0A0809K2S0    | 1432   | 621942   | 2x CBM25; CBM26  | -                  |
| 3.  | pAAMY   | -         | Human fecal sample (HG)                                                                   | <i>Bifidobacterium ruminantium</i>              | MBU9112168.1  | -              | 1200   | 636957   | -                | CBM26              |
| 4.  | pAAMY   | GHI3_28   | Human feces (HG)                                                                          | <i>Bifidobacterium angulatum</i>                | RSX557563.1   | A0A1268J3D8    | 1527   | 629950   | 2x CBM20; CBM26  | -                  |
| 5.  | pAAMY   | -         | Human feces (HG)                                                                          | <i>Bifidobacterium moryella</i>                 | SIJ25486.1    | UP1000218P34   | 1186   | 652978   | -                | CBM26              |
| 6.  | pAAMY   | -         | Human dental plaque (RoG)                                                                 | <i>Bifidobacterium turkense</i>                 | KFJ06122.1    | A0A087E1C1     | 1361   | 650971   | -                | CBM25              |
| 7.  | pAAMY   | GHI3_28   | -                                                                                         | <i>Bifidobacterium pseudocatalanum</i>          | BAR041661     | UP1000847757   | 1434   | 621942   | CBM20; CBM26     | -                  |
| 8.  | pAAMY   | GHI3_28   | <i>Sus scrofa</i> caecum (PG)                                                             | <i>Bifidobacterium pseudobongum</i>             | UBZ05046.1    | -              | 1530   | 644956   | CBM25            | -                  |
| 9.  | pAAMY   | GHI3_28   | Rumen fluid of <i>Bostaurus</i> (I)                                                       | <i>Bifidobacterium choerium</i>                 | ATU197821     | A0A2D3D2U4     | 1613   | 644956   | CBM25            | -                  |
| 10. | pAAMY   | -         | Human adult intestine (HG)                                                                | <i>Bifidobacterium gallicum</i>                 | KF159086.1    | A0A087A3G6     | 1612   | 648960   | -                | CBM25              |
| 11. | pAAMY   | -         | <i>Dolichospathogon</i> faecal samples (RoG)                                              | <i>Bifidobacterium dolichotidis</i>             | RSX55520.1    | A0A43F8N0      | 1228   | 635946   | -                | CBM25              |
| 12. | pAAMY   | -         | <i>Citrobacter</i> feces (RoG)                                                            | <i>Bifidobacterium cantoris</i>                 | RSX43996.1    | A0A4308B2      | 1439   | 635944   | -                | CBM25              |
| 13. | pAAMY   | -         | -                                                                                         | <i>Pseudoscardovia suis</i>                     | PJ02656.1     | UP1000CB6C43C  | 1455   | 621934   | -                | CBM26              |
| 14. | pAAMY   | -         | <i>Sus scrofa</i> digestive tract (PG)                                                    | <i>Pseudoscardovia suis</i>                     | OZG535671     | A0A261B64      | 2041   | 624937   | -                | CBM26              |
| 15. | pAAMY   | -         | Wastewater (W)                                                                            | <i>Bifidobacterium minimum</i>                  | KIT71064.1    | A0A087D8K4     | 1457   | 631943   | -                | 2x CBM25; CBM26    |
| 16. | pAAMY   | -         | Swine feces (PG)                                                                          | <i>Bifidobacterium thermophilum</i>             | KFJ07018.1    | UP100050102E   | 1642   | 604917   | -                | CBM26              |
| 17. | pAAMY   | -         | Feces of <i>tanania</i> (RG)                                                              | <i>Bifidobacterium goldii</i>                   | RSX51755.1    | A0A430FF13     | 1522   | 632946   | -                | 2x CBM20; CBM25    |
| 18. | pAAMY   | -         | -                                                                                         | <i>Bifidobacterium pullorum</i>                 | WP_244644.1   | UP1000856DCA0  | 1251   | 626939   | -                | CBM25              |
| 19. | pAAMY   | -         | -                                                                                         | <i>Gallus gallus</i> ingluvies                  | GGI4461.1     | UP100066Q4DC   | 1473   | 650963   | -                | 3x CBM25           |
| 20. | HYPO    | -         | Human gut (HG)                                                                            | <i>Prevotella</i> sp.                           | MBD927186.1   | UP1000DD49E24  | 677    | 373677   | -                | CBM26              |
| 21. | pAAMY   | -         | Human feces (HG)                                                                          | <i>Prevotella</i> sp.                           | TFH82515.1    | A0A4Y8VPY7     | 1095   | 7911095  | -                | CBM26              |
| 22. | pAAMY   | -         | Human gut (HG)                                                                            | <i>Prevotella</i> sp. CAG-36                    | CD291311      | RQCE37         | 1082   | 7751082  | -                | CBM26              |
| 23. | pAAMY   | -         | Human fecal samples (HG)                                                                  | <i>Prevotella copri</i>                         | MBV3413028.1  | -              | 1092   | 7811092  | -                | CBM26              |
| 24. | pDOC    | -         | Equine fecal microbiome (EG)                                                              | <i>Oscillospira</i> bacterium                   | MBQ097748.1   | -              | 575    | 45344    | -                | CBM26              |
| 25. | pDOC    | -         | <i>Gallus gallus</i> gut (CG)                                                             | <i>Candidatus Scatimonomas digibitarum</i>      | MBQ8147.1     | -              | 714    | 235533   | -                | CBM26              |
| 26. | pDOC    | -         | Human gut (HG)                                                                            | <i>Eubacterium</i> sp. CAG-202                  | CD032291      | R6N48          | 671    | 175505   | -                | -                  |
| 27. | pDOC    | -         | Human feces (HG)                                                                          | <i>Eubacterium</i> sp. OM08-24                  | RG0191321     | A0A374UMY1     | 737    | 241571   | -                | CBM26              |
| 28. | DOC     | -         | Human gut (HG)                                                                            | <i>Ruminococcus bromii</i>                      | CBU15887.1    | UP1000KD4E31   | 734    | 242572   | CBM26            | -                  |
| 29. | pDOC    | -         | Rumen fluid of <i>Bostaurus</i> (RG)                                                      | <i>Ruminococcus</i> sp. JE7A12                  | QCT06902.1    | A0A4P8XW45     | 730    | 240570   | CBM26            | -                  |
| 30. | pDOC    | -         | <i>Gallus gallus</i> gut (CG)                                                             | <i>Candidatus Scatimonomas digibitarum</i>      | H1R02602.1    | -              | 949    | 435759   | -                | CBM26              |
| 31. | pDOC    | -         | Gast. gastrointestinal tract (RG)                                                         | <i>Clostridia</i> bacterium                     | MBQ2687704.1  | -              | 985    | 431532   | -                | CBM26              |
| 32. | pAAMY   | -         | Gast. gastrointestinal tract (RG)                                                         | <i>Succinomonas</i> sp.                         | MBQ268772.1   | -              | 1799   | 543836   | -                | CBM26              |
| 33. | pAAMY   | -         | -                                                                                         | <i>Succinomonas amylolytica</i>                 | WP_0900070.1  | UP1000G80E766  | 1786   | 533826   | -                | 3x CBM26           |
| 34. | pAAMY   | -         | Roe deer gastrointestinal tract (RG)                                                      | <i>Ruminobacter</i> sp.                         | MBR19249241   | -              | 2051   | 8081101  | -                | CBM26              |
| 35. | pAAMY   | -         | Dairy cattle gastrointestinal tract (RG)                                                  | <i>Succinivibrionaceae</i> bacterium            | MBQ5525197.1  | -              | 2157   | 941232   | -                | -                  |
| 36. | pAAMY   | -         | -                                                                                         | <i>Ruminobacter amylophilus</i>                 | SFP12024.1    | A0A662ZIG8     | 1959   | 7211015  | -                | CBM26              |
| 37. | pAAMY   | -         | -                                                                                         | <i>Vibrio vulnificus</i>                        | MBN105119.1   | UP1000BD4A75   | 2050   | 694982   | -                | CBM26              |
| 38. | pAAMY   | -         | Cattle (RG)                                                                               | <i>Vibrio parvulus</i>                          | MBE457948.1   | UP1000B69B6D   | 2476   | 687978   | -                | CBM26              |
| 39. | pAAMY   | -         | -                                                                                         | <i>Vibrio cholerae</i> sensu stricto            | WP_2813032.1  | -              | 2465   | 694983   | -                | CBM26              |
| 40. | pDOC    | -         | anaerobic digestion of organic wastes under variable temperature conditions and feedstock | <i>Fusobacterium</i> bacterium                  | NLX6311981    | A0A7X8U1U3     | 599    | 307599   | -                | -                  |
| 41. | pDOC    | -         | -                                                                                         | <i>Orania matsmurtii</i>                        | TDX525251     | A0A4R8H00      | 804    | 508804   | -                | -                  |
| 42. | HYPO    | -         | Sheep gastrointestinal tract (RG)                                                         | <i>Spirochaetes</i> bacterium                   | MBR23173211   | -              | 838    | 533838   | -                | -                  |
| 43. | HYPO    | -         | Water deer gut (RG)                                                                       | <i>Trapozoma</i> sp.                            | MBP56202.1    | UP1000B74B07   | 879    | 578879   | -                | -                  |
| 44. | pAAMY   | -         | -                                                                                         | <i>Microbacterium agorici</i>                   | PTG54111      | A0A2A9DSR8     | 1398   | 10981398 | -                | 2x CBM25           |
| 45. | pAAMY   | -         | -                                                                                         | <i>Microbacterium indicus</i>                   | TQ0224191     | UP100070BA3D   | 1398   | 10981398 | -                | 2x CBM25           |
| 46. | pAAMY   | -         | -                                                                                         | <i>Microbacterium fundamini</i>                 | WP_1698256.1  | UP100011DC7DD  | 1401   | 1101401  | -                | 2x CBM25           |
| 47. | pAAMY   | -         | -                                                                                         | <i>Arthrobacterium</i>                          | NJC3192.1     | A0A846R3V6     | 1402   | 11021402 | -                | 2x CBM25           |
| 48. | pAAMY   | -         | -                                                                                         | <i>Microbacterium</i> sp. A18L201               | WP_1442089.1  | UP1000889AD3   | 1124   | 8251124  | -                | 2x CBM25           |
| 49. | pAAMY   | -         | -                                                                                         | <i>Agromyces atrium</i>                         | NYD67366.1    | A0A4Q2M4N3     | 1310   | 10101310 | -                | CBM25              |
| 50. | HYPO    | -         | Larvae of insect <i>Trypoxys dithomae</i> (I)                                             | <i>Microbacterium</i> sp. BWT-G7                | MCC20335501   | -              | 361    | 61361    | -                | -                  |
| 51. | pAAMY   | -         | -                                                                                         | <i>Arthrobacter luteolus</i>                    | MBP241225.1   | UP1000DY5CE1   | 2095   | 9821283  | -                | 3x CBM25           |
| 52. | HYPO    | GHI3_31   | <i>Hydrothermal vent</i> (I)                                                              | <i>Thermotoga</i> sp.                           | WP_0900070.1  | UP1000G80E766  | 1786   | 533826   | -                | 3x CBM26           |
| 53. | HYPO    | -         | Wastewater (W)                                                                            | <i>Aeromonas</i> bacterium                      | MBP817241.1   | UP1000B40EC5   | 701    | 400701   | -                | -                  |
| 54. | pAAMY   | GHI3_32   | <i>Hydrothermal vent</i> (I)                                                              | <i>Sargolobus</i> sp. HDW7                      | QIK8188.1     | A0A6G2ZA5A     | 1153   | 8531153  | 2x CBM25         | -                  |
| 55. | HYPO    | -         | -                                                                                         | <i>Streptomyces</i> sp. NBRC 109706             | WP_0221421.1  | UP10000782FAB  | 355    | 51353    | -                | -                  |
| 56. | HYPO    | -         | anaerobic digestion of organic wastes under variable temperature conditions and feedstock | <i>Polysphondylium</i> bacterium                | NL0701761     | UP1000A62B17   | 613    | 23335    | -                | CBM26              |
| 57. | pDOC    | -         | activated sludge from Hong Kong Shatin wastewater treatment plant (W)                     | <i>Flavobacterium</i> bacterium                 | MCB92019971   | -              | 604    | 30336    | -                | CBM26              |
| 58. | pAAMY   | GHI3_28   | -                                                                                         | <i>Clostridium thermophilum</i> M240            | CDN879531     | WGRU19         | 1725   | 7781086  | CBM26            | -                  |
| 59. | HYPO    | -         | -                                                                                         | <i>Gallus gallus</i> gut (CG)                   | MBN16820797.1 | UP1000A52FDA   | 545    | 54359    | -                | -                  |
| 60. | HYPO    | -         | -                                                                                         | <i>Lachnospiraceae</i> bacterium                | HAL84760.1    | A0A349Y1H5     | 709    | 75374    | -                | 3x CBM25           |
| 61. | pAAMY   | -         | <i>Gallus gallus</i> gut (CG)                                                             | <i>Candidatus Mediteranea bacter</i> coelacanth | HJA65501.1    | -              | 1527   | 8481145  | -                | CBM26              |
| 62. | pAAMY   | -         | -                                                                                         | <i>Lachnospiraceae</i> bacterium                | WP_12611101.1 | UP1000B4610D6  | 1424   | 8291126  | -                | CBM26              |
| 63. | pAAMY   | -         | Human feces (HG)                                                                          | <i>Eubacterium rectale</i>                      | RGW40801.1    | A0A413BH0P0    | 913    | 225523   | -                | CBM26              |
| 64. | HYPO    | -         | <i>Macaca fascicularis</i> feces (PG)                                                     | <i>Clostridium</i> sp. MS-58                    | MBU5488563.1  | -              | 720    | 46344    | -                | -                  |
| 65. | pAAMY   | -         | -                                                                                         | <i>Pseudomonas aeruginosa</i> ATCC 27852        | WP_16765103.1 | UP1000D10884   | 1474   | 7851092  | -                | CBM26              |
| 66. | pAAMY   | -         | -                                                                                         | uncultured <i>Eubacterium</i> sp.               | SCS6911       | A0A1C61B8      | 1518   | 8771180  | -                | CBM26              |
| 67. | pDOC    | -         | Rumen fluid of <i>Bostaurus</i> (RG)                                                      | <i>Ruminococcus</i> sp.                         | QCT07491.1    | A0A4P8XW17     | 648    | 225528   | CBM26            | -                  |
| 68. | pAAMY   | GHI3_28   | Tonsil scrape of <i>Sus scrofa</i> (PG)                                                   | <i>Streptococcus</i> sp.                        | AWX97480.1    | A0A2ZAP17      | 1636   | 7631063  | 4x CBM26         | -                  |
| 69. | HYPO    | -         | <i>Macaca fascicularis</i> feces (PG)                                                     | <i>Lachnospiraceae</i> bacterium P7             | MBU5462054.1  | -              | 921    | 39341    | -                | -                  |
| 70. | pDOC    | -         | -                                                                                         | <i>Ruminococcus</i> sp.                         | SCX01552.1    | A0A1G4V5K7     | 925    | 39340    | -                | -                  |
| 71. | HYPO    | -         | Human feces (HG)                                                                          | <i>Clostridium</i> sp.                          | MB8660272.1   | -              | 811    | 51347    | -                | -                  |
| 72. | HYPO    | -         | Porcine fecal sample (PG)                                                                 | <i>Mutibacter</i> bacterium                     | MBP351284.1   | -              | 524    | 28333    | -                | CBM26              |
| 73. | pAAMY   | -         | Human gut (HG)                                                                            | <i>Clostridium</i> sp. CAG-41                   | CDE4637.1     | RT1Z7          | 1517   | 8331132  | -                | -                  |
| 74. | pAAMY   | -         | <i>Myodes glauco</i> feces (RoG)                                                          | <i>Barnesiella</i> sp.                          | MBD528098.1   | UP1000BA0732   | 1110   | 7551059  | -                | -                  |
| 75. | pDOC    | -         | Sheep gastrointestinal tract (RG)                                                         | <i>Paludibacteriaceae</i> bacterium             | MBR38723411   | -              | 570    | 208513   | -                | -                  |
| 76. | pAAMY   | -         | <i>Gallus gallus</i> gut (CG)                                                             | <i>Candidatus Amulnupter coequebularis</i>      | RX123900.1    | A0A4Q0U9L8     | 1131   | 7531054  | -                | -                  |
| 77. | pAAMY   | -         | <i>Myodes glauco</i> feces (RoG)                                                          | <i>Bacteroides</i> sp.                          | MBD5349186.1  | UP10001C3840C  | 1269   | 9051217  | -                | 2x CBM26           |
| 78. | HYPO    | -         | Wastewater (W)                                                                            | <i>Brevibacterium</i> sp.                       | MBP84035.1    | UP1000B6D11F8  | 454    | 138454   | -                | -                  |
| 79. | HYPO    | -         | Sea Water from shallow coastal region                                                     | <i>Alagomyces marinus</i>                       | WP_06057799.1 | UP1000078B6    | 994    | 688994   | -                | CBM26              |
| 80. | HYPO    | -         | Sea Water from shallow coastal region                                                     | <i>Alagomyces marinus</i>                       | WP_0607042.1  | UP1000078A61D5 | 994    | 688994   | -                | CBM26              |
| 81. | pAAMY   | GHI3_19   | Soil (S)                                                                                  | <i>Pantothecium sonchii</i>                     | QZQ6041.1     | A0A7U1B86      | 1583   | 12961583 | 2x CBM25; CBM26  | -                  |
| 82. | pAAMY   | -         | <i>Pantothecium sonchii</i>                                                               | <i>Pantothecium sonchii</i>                     | SDL8504.1     | A0A1G9NF80     | 1585   | 12961585 | -                | 2x CBM25; CBM26    |
| 83. | pAAMY   | -         | Milk (M)                                                                                  | <i>Pantothecium borealis</i>                    | OMD46076.1    | A0A1R0YDQ8     | 2351   | 20642351 | -                | 3x CBM25; CBM26    |
| 84. | pAAMY   | -         | Soil (S)                                                                                  | <i>Pantothecium borealis</i>                    | RUT36321.1    | A0A433XQ26     | 2641   | 23542641 | -                | 2x CBM25; CBM26    |
| 85. | pAAMY   | GHI3_19   | Marine sediment (MS)                                                                      | <i>Pantothecium borealis</i>                    | ASA2074.1     | A0A22K6E7      | 1578   | 12911578 | -                | 2x CBM25; CBM26    |
| 86. | pAAMY   | -         | <i>Aporrotheca caliginosa</i> gut (AcG)                                                   | <i>Pantothecium borealis</i>                    | RUT4780.1     | A0A381DTY1     | 2567   | 22802567 | -                | 2x CBM25; CBM26    |
| 87. | pAAMY   | -         | -                                                                                         | <i>Pantothecium borealis</i>                    | SDG8409.1     | A0A1G7UUK6     | 2442   | 21532442 | -                | 2x CBM25; 2x CBM26 |
| 88. | pAAMY   | -         | Soil (S)                                                                                  | <i>Pantothecium borealis</i>                    | MBW309331     | A0A7XGQNM1     | 1675   | 13881675 | -                | 3x CBM25; CBM26    |
| 89. | pAAMY   | -         | Soil (S)                                                                                  | <i>Pantothecium borealis</i>                    | EFM88001      | E0IF24         | 1677   | 13901677 | -                | 3x CBM25; CBM26    |
| 90. | pAAMY   | GHI3_19   | Human blood (HB)                                                                          | <i>Cohnella</i> sp. KS 22                       | QMV43648.1    | A0A7G5C84      | 1587   | 13001587 | 2x CBM25; CBM26  | -                  |
| 91. | pAAMY   | GHI3_19   | -                                                                                         | unidentified bacterium UGO163                   | CAA37453.1    | Q0658          | 1684   | 13971684 | 3x CBM25; CBM26  | -                  |
| 92. | HYPO    | -         | anaerobic digestion of organic wastes under variable temperature conditions and feedstock | <i>Bacilli</i> bacterium                        | HHU20570.1    | A0A7V6LK53     | 426    | 139426   | -                | -                  |
| 93. | pAAMY   | -         | nile wet CD01 at time point 6 / F; 5m depth; 0.2 filter                                   | <i>Leptotheca</i> bacterium GWE_57_35           | OGV41563.1    | A0A1G0YGL0     | 1484   | 11941484 | -                | CBM25              |
| 94. | HYPO    | -         | Wastewater (W)                                                                            | <i>Kiritia</i> bacterium                        | MBP57383.1    | UP1000B4DD0FE  | 871    | 586871   | -                | -                  |
| 95. | pAAMY   | -         | rare earth element/silica mine drainage contaminated river water                          | <i>Verrucomicrobium</i> bacterium               | MBU6182917.1  | UP1000IC298BD  | 1518   | 12131518 | -                | -                  |
| 96. | HYPO    | -         | activated sludge from Hong Kong Shatin wastewater treatment plant (W)                     | <i>Myxococcus</i> bacterium                     | MCA9546954.1  | UP10001E396C8  | 419    | 19305    | -                | -                  |
| 97. | HYPO    | -         | -                                                                                         | <i>Myxococcus</i> bacterium                     | MBU142708.1   | -              | 471    | 20309    | -                | -                  |
| 98. | HYPO    | -         | bioresorbs inoculated with microbial mats from alkaline soda lake                         | <i>Candidatus Nitrospira</i> bacterium          | MCC58764231   | -              | 1755   | 181462   | -                | CBM25; 2x CBM53    |
| 99. | HYPO    | -         | Deep marine sediment from hydrothermal vent                                               | <i>Dehalobacter</i> bacterium                   | MBW278654.1   | -              | 401    | 105401   | -                | -                  |

\* All CBM74 originate from bacterial genomes. Sources of isolation: AG, *Aeromonas* sp.; CO, chicken gut; EG, equine gut; HB, human blood; HG, human gut; I, insect; M, milk; MS, marine sediment; PG, pig gut; PG, porcine gut; RoG, rodent gut; RG, ruminant gut; S, soil; W, wastewater. \* According to CAZy. \*\* According to Pfam and/or InterPro.

1158

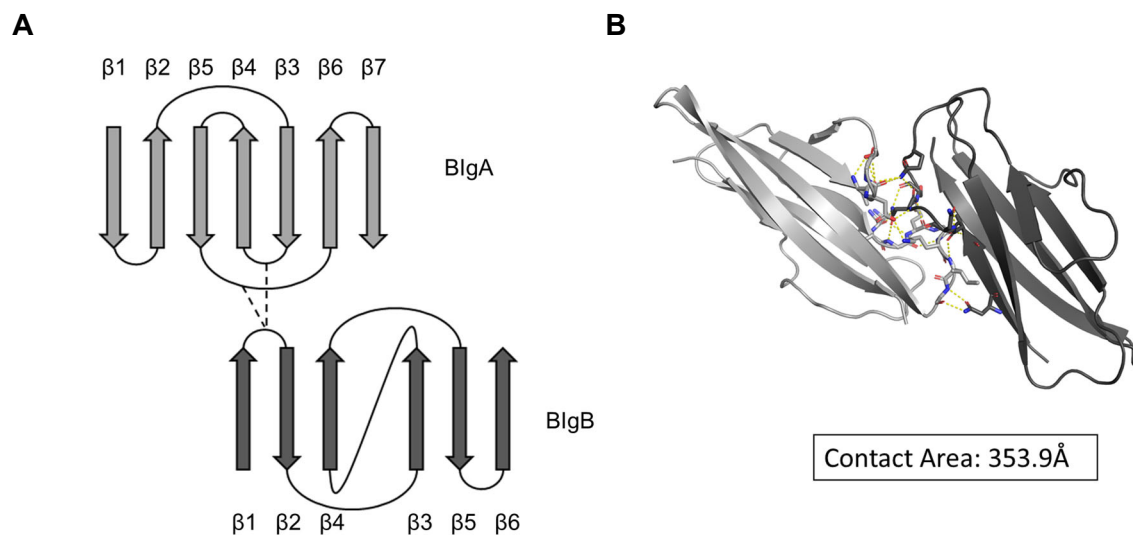

1159 **Extended Data Figure 1: Bacterial Ig-like domains of Sas6 interact via extensive**  
 1160 **hydrogen bonding. A.** Topology map of BlgA and BlgB domains illustrating the Greek key  
 1161 motif in BlgA and showing the loops that hydrogen bond with one another. **B.** A surface area  
 1162 analysis of the Blg domains using PISA in CCP4 gives a buried surface area of 353.9Å<sup>2</sup> [37].  
 1163 Residues providing hydrogen bonding are represented by stick side chains and the hydrogen  
 1164 bonds are shown by dashed yellow lines.

1165

1166



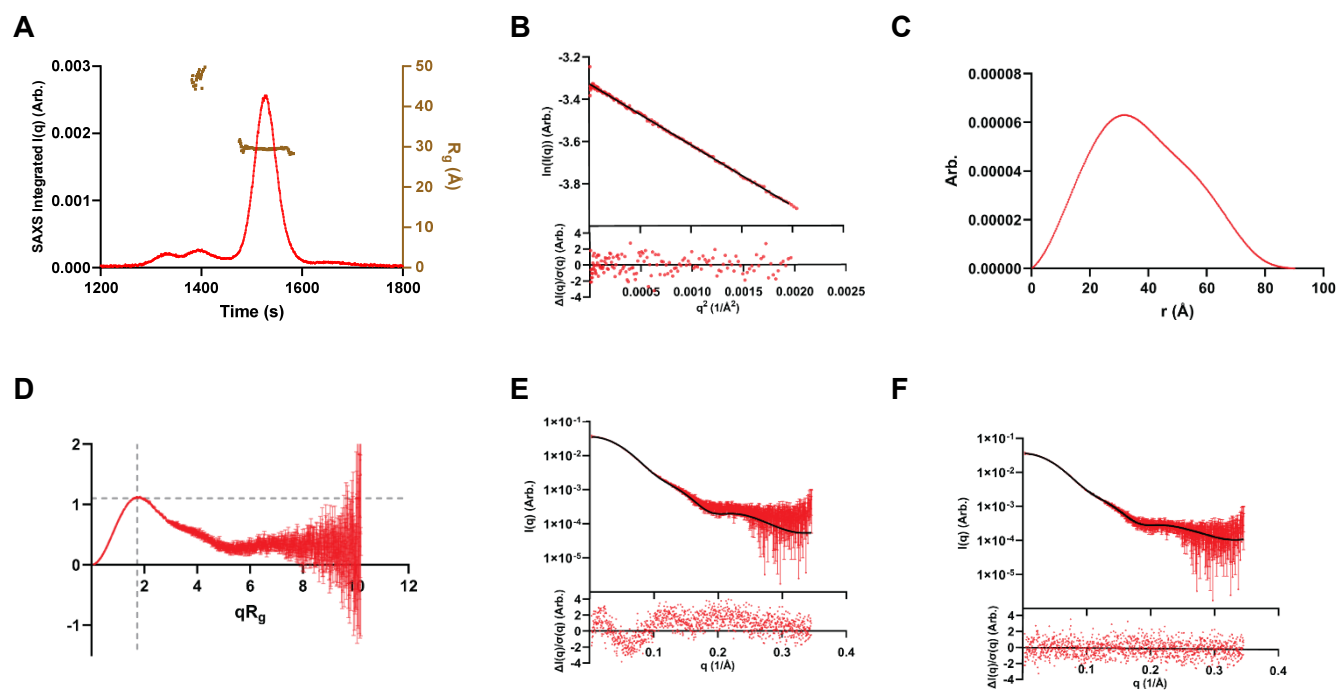

**Extended Data Figure 2: Small Angle X-Ray Scattering indicates that Sas6 remains mostly compact in solution with minor extension beyond that of the crystal structure. A.** Total subtracted scattering intensity (left y axis) and  $R_g$  (right y axis) as a function of time for the SEC-SAXS elution. **B.** Guinier fit analysis with normalized residual shown in the bottom panel. **C.**  $P(r)$  versus  $r$  normalized by  $I(0)$ . **D.** Dimensionless Kratky plot;  $y=3/e$  and  $x=\sqrt{3}$  as dashed gray lines to indicate where a globular protein would peak. **E.** FoXS and **F.** MultiFoXS fits (black) to the Sas6T SAXS data (red) with normalized residual shown in the bottom panel.



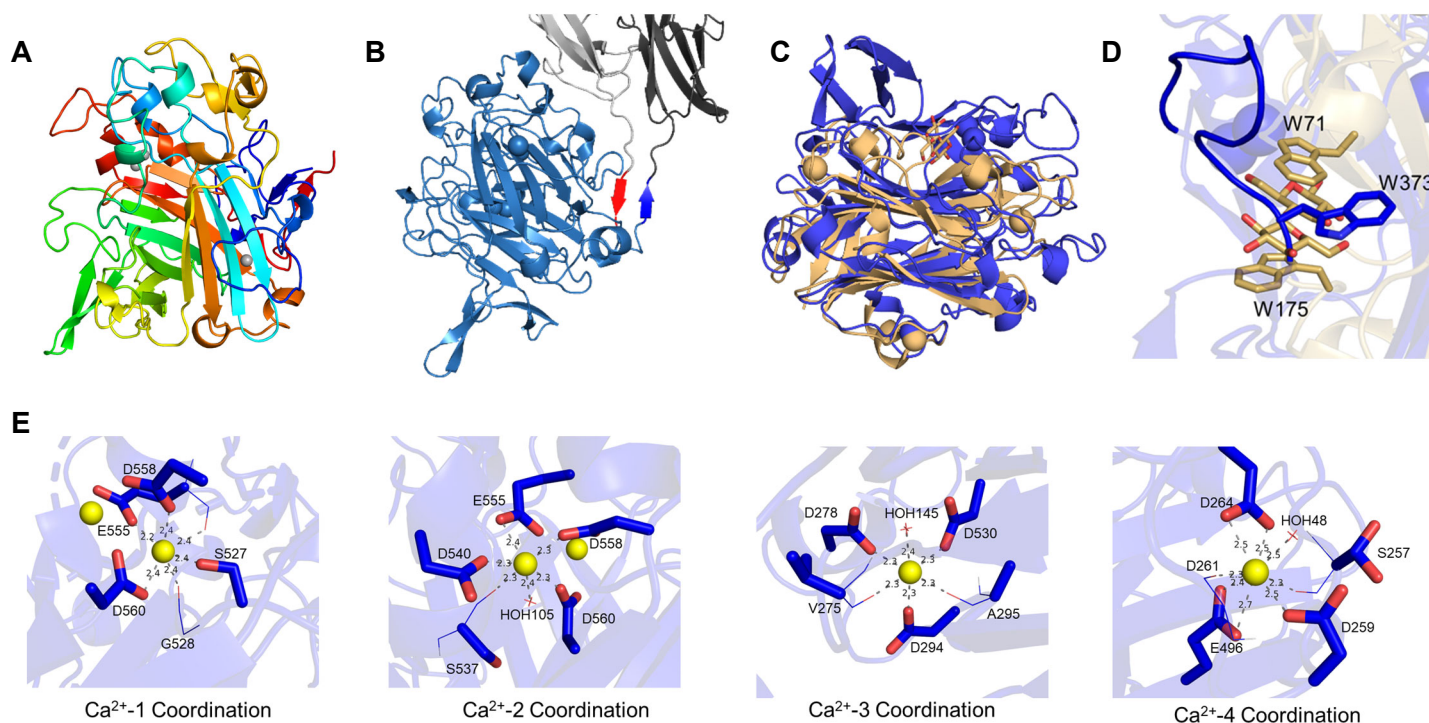

**F**

| ID                                                                  | Res. | Metal | Occupancy <sup>1</sup> | B factor (env.) <sup>1</sup> | Ligands        | Valence <sup>2</sup> | nVECSUM <sup>3</sup> | Geometry <sup>1,4</sup> | gRMSD(°) <sup>1</sup> | Vacancy <sup>1</sup> | Bidentate | Alt. metal |
|---------------------------------------------------------------------|------|-------|------------------------|------------------------------|----------------|----------------------|----------------------|-------------------------|-----------------------|----------------------|-----------|------------|
| C:1                                                                 | CA   | Ca    | 1                      | 12.9 (12.1)                  | O <sub>7</sub> | 2                    | 0.067                | Octahedral              | <u>16.1°</u>          | 0                    | 1         |            |
| C:2                                                                 | CA   | Ca    | 1                      | 12.7 (13.1)                  | O <sub>7</sub> | 2.2                  | 0.053                | Octahedral              | 12.8°                 | 0                    | 1         |            |
| C:3                                                                 | CA   | Ca    | 1                      | 9.2 (10.3)                   | O <sub>6</sub> | 2                    | 0.046                | Octahedral              | 6.5°                  | 0                    | 0         |            |
| C:4                                                                 | CA   | Ca    | 1                      | 13.7 (14.5)                  | O <sub>8</sub> | 1.9                  | 0.036                | Octahedral              | <u>15.1°</u>          | 0                    | 2         |            |
| C:6                                                                 | CA   | Ca    | 1                      | 10.2 (10.7)                  | O <sub>7</sub> | 1.8                  | 0.068                | Octahedral              | <u>14.2°</u>          | 0                    | 1         |            |
| C:7                                                                 | CA   | Ca    | 1                      | 10.6 (12.1)                  | O <sub>7</sub> | 2.2                  | 0.05                 | Octahedral              | 12.1°                 | 0                    | 1         |            |
| C:8                                                                 | CA   | Ca    | 1                      | 10.8 (10.5)                  | O <sub>6</sub> | 2                    | 0.05                 | Octahedral              | 7.2°                  | 0                    | 0         |            |
| C:9                                                                 | CA   | Ca    | 1                      | 19.2 (21.6)                  | O <sub>7</sub> | 2                    | 0.026                | Octahedral              | <u>16.2°</u>          | 0                    | 1         |            |
| <b>Legend:</b> [Not applicable] [Outlier] [Borderline] [Acceptable] |      |       |                        |                              |                |                      |                      |                         |                       |                      |           |            |

| Column                       | Description                                                                                                                                                                                                                           |
|------------------------------|---------------------------------------------------------------------------------------------------------------------------------------------------------------------------------------------------------------------------------------|
| Occupancy <sup>1</sup>       | Occupancy of ion under consideration                                                                                                                                                                                                  |
| B factor (env.) <sup>1</sup> | Metal ion B factor, with valence-weighted environmental average B factor in parenthesis                                                                                                                                               |
| Ligands                      | Elemental composition of the coordination sphere                                                                                                                                                                                      |
| Valence <sup>2</sup>         | Summation of bond valence values for an ion binding site. <i>Valence</i> accounts for metal-ligand distances                                                                                                                          |
| nVECSUM <sup>3</sup>         | Summation of ligand vectors, weighted by bond valence values and normalized by overall valence. Increase when the coordination sphere is not symmetrical due to incompleteness.                                                       |
| Geometry <sup>1,4</sup>      | Arrangement of ligands around the ion, as defined by the <i>NEIGHBORHOOD</i> algorithm                                                                                                                                                |
| gRMSD(°) <sup>1</sup>        | R.M.S. Deviation of observed geometry angles (L-M-L angles) compared to ideal geometry, in degrees                                                                                                                                    |
| Vacancy <sup>1</sup>         | Percentage of unoccupied sites in the coordination sphere for the given geometry                                                                                                                                                      |
| Bidentate                    | Number of residues that form a bidentate interaction instead of being considered as multiple ligands                                                                                                                                  |
| Alt. metal                   | A list of alternative metal(s) is proposed in descending order of confidency, assuming metal environment is accurately determined. This feature is still experimental. It requires user discrimination and cannot be blindly accepted |

1177 **Extended Data Figure 3: RbCBM74 is a singular globular domain, most similar to**  
 1178 **TmCBM9 A.** Structure of RbCBM74 (PDB 7uwv) colored from N-terminus (blue) to C-terminus

(red). **B.** Short  $\beta$ -strands leading into and out of *RbCBM74* domain are colored in red and blue. **C.** Overlay of *TmCBM9* (gold) (PDB 1i82-A) and *RbCBM74* (blue). The DALI server calculated an RMSD of 3.2Å and sequence identity of 17%. **D.** Close-up view of *TmCBM9* binding site showing the two *TmCBM9* Trp residues involved in binding cellobiose (gold) and W373 of *RbCBM74* (blue) which lies in the same region but is occluded from the surface by a loop containing residues 374-384. **E.** Zoomed in view of calciums coordinated in the *RbCBM74* domain with side chains shown in sticks, main chain shown in lines and  $\text{Ca}^{2+}$  ions by yellow spheres. Atomic distances are shown in Å and residues are labeled. Residues are colored by element with oxygen shown in red. **F.** Ion validation by web server CheckMyMetal [72].

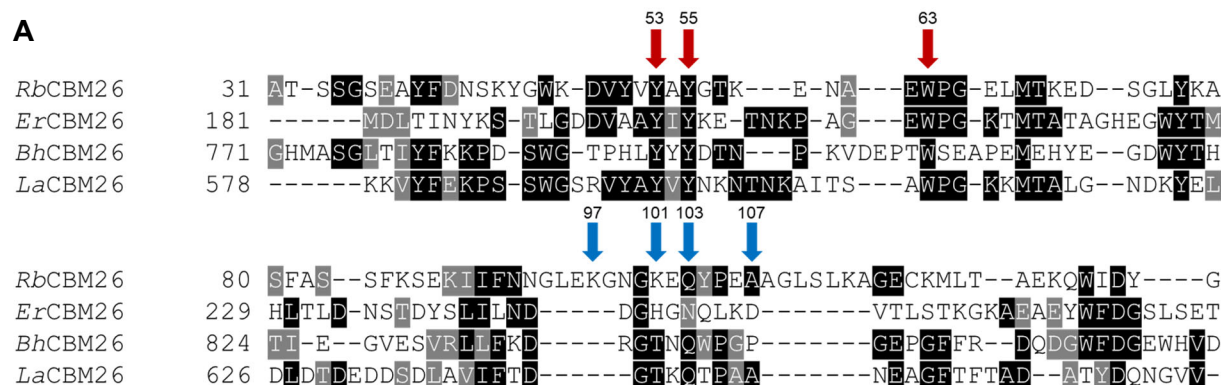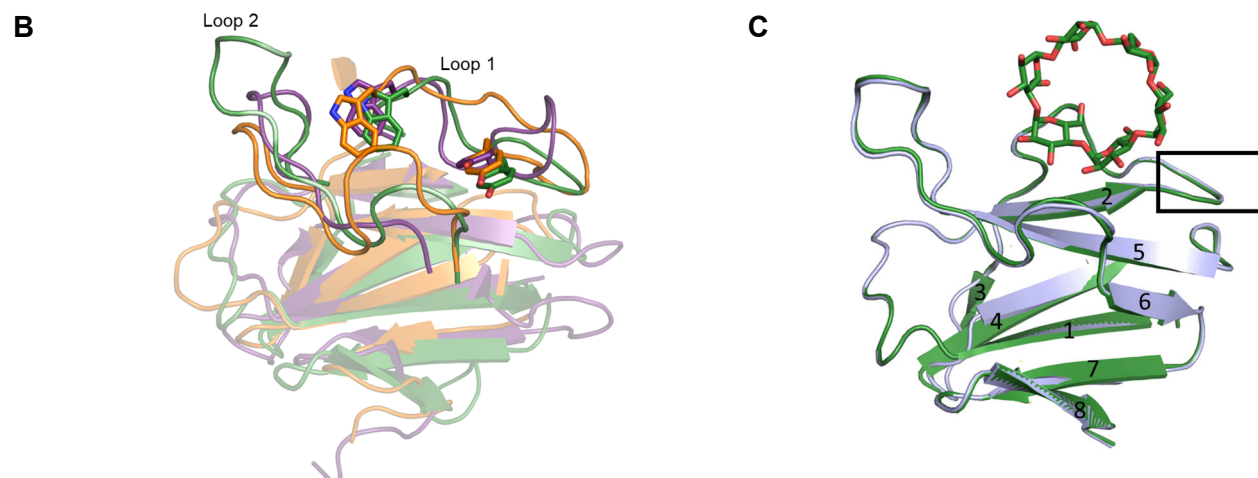

**Extended Data Figure 4: *RbCBM26* shares a conserved binding site with other CBM26 family members.** **A.** Sequence alignment of *RbCBM26* (RBL236\_00020), *ErCBM26* (ERE\_20420), *BhCBM26* (BH0413), and *LaCBM26* (Q48502). Conserved binding site residues are indicated by a red arrow while variable residues are indicated by a blue arrow and provide hydrogen bonding. **B.** Overlay of *RbCBM26* (green) with *Bacillus halodurans* CBM26 (PDB 2c3h, orange), and *Eubacterium rectale* Amy13K CBM26 (PDB 6b3p, purple). **C.** Overlay of unliganded *RbCBM26* (blue) and ACX-bound *RbCBM26* (green) showing that loop 1 does not move upon ligand binding.  $\beta$ -strands are numbered for reference.

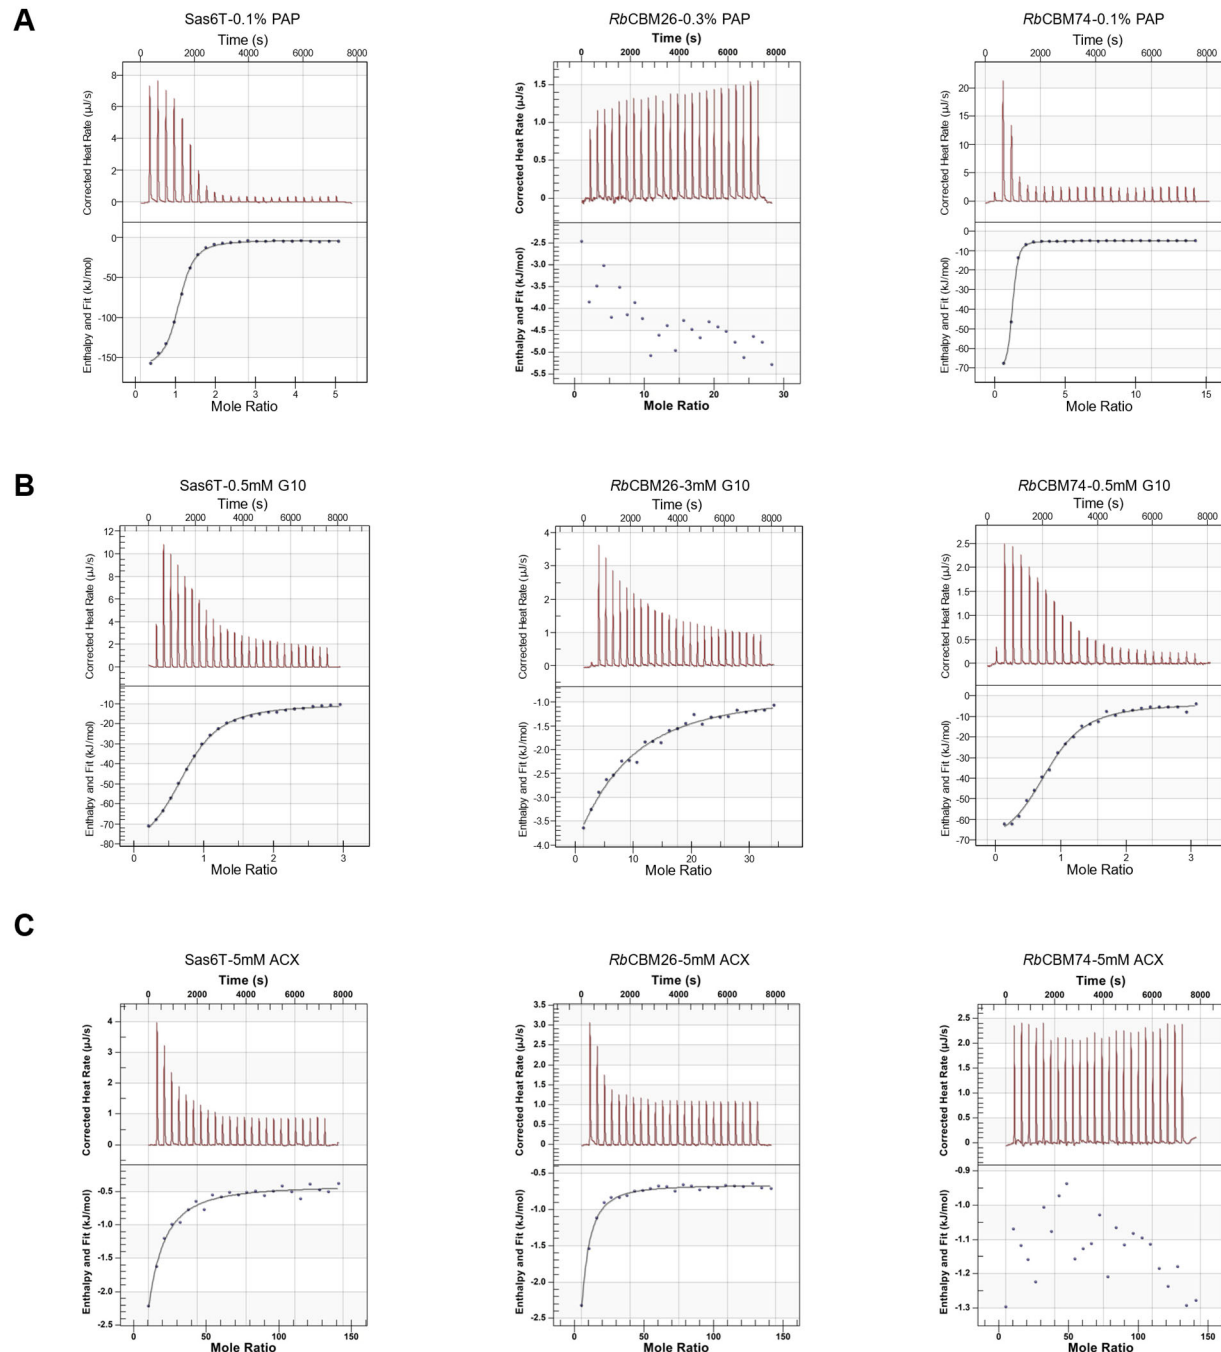

**Extended Data Figure 5: Representative ITC graphs of Sas6 domains.** Sas6T, RbCBM74, and Blg-RbCBM74-Blg binding to **A.** potato amylopectin, **B.** maltodecaose (G10), and **C.**  $\alpha$ -cyclodextrin (ACX).



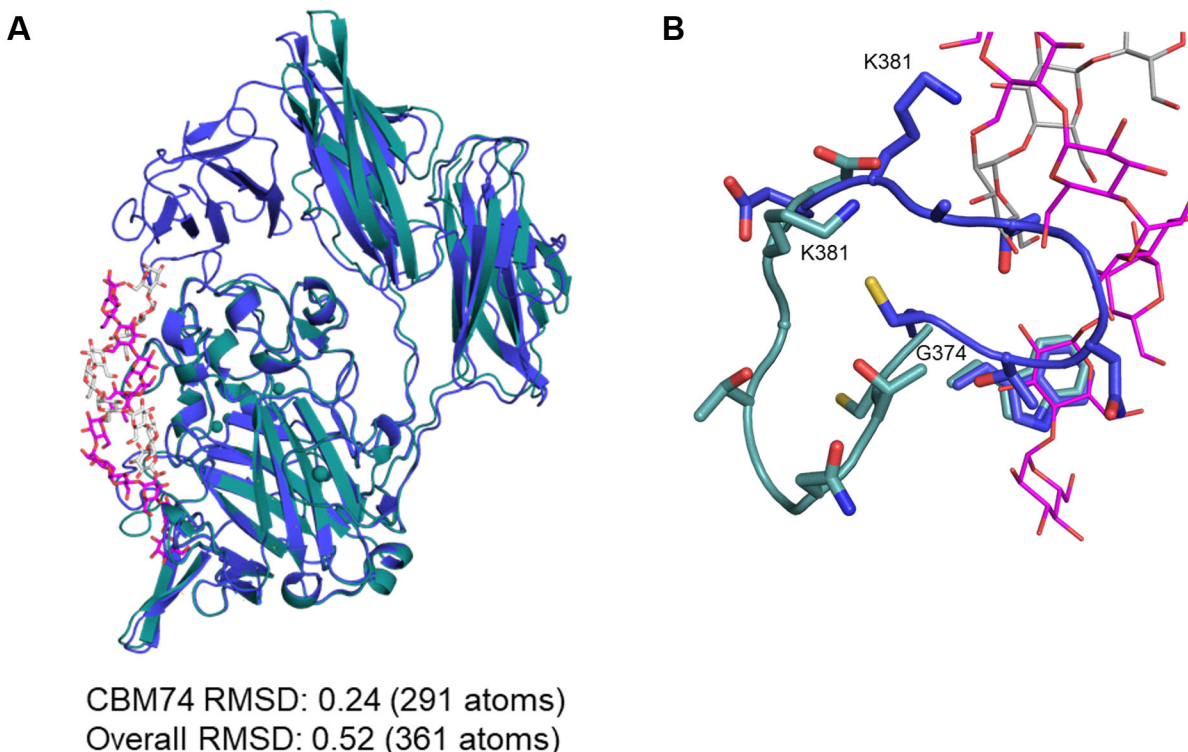

**C**

| ID                                                                          | Res. | Metal | Occupancy | B factor (env.) <sup>1</sup> | Ligands        | Valence <sup>2</sup> | nVECSUM <sup>3</sup> | Geometry <sup>1,4</sup>     | gRMSD(°) <sup>1</sup> | Vacancy <sup>1</sup> | Bidentate | Alt. metal |
|-----------------------------------------------------------------------------|------|-------|-----------|------------------------------|----------------|----------------------|----------------------|-----------------------------|-----------------------|----------------------|-----------|------------|
| B:1                                                                         | CA   | Ca    | 1         | 21.4 (22)                    | O <sub>7</sub> | 1.9                  | <u>0.11</u>          | Octahedral                  | 13°                   | 0                    | 1         |            |
| B:2                                                                         | CA   | Ca    | 1         | 21.3 (22.7)                  | O <sub>7</sub> | 2.2                  | 0.1                  | Octahedral                  | 11°                   | 0                    | 1         |            |
| B:3                                                                         | CA   | Ca    | 1         | 20.4 (20.5)                  | O <sub>6</sub> | 2                    | 0.028                | Octahedral                  | 6.3°                  | 0                    | 0         |            |
| C:1                                                                         | NA   | Na    | 1         | <u>25.4 (33.4)</u>           | O <sub>5</sub> | 1                    | 0.1                  | <u>Trigonal Bipyramidal</u> | 8.4°                  | 0                    | 0         |            |
| <b>Legend:</b> [Not applicable] <b>Outlier</b> <u>Borderline</u> Acceptable |      |       |           |                              |                |                      |                      |                             |                       |                      |           |            |

| Column                       | Description                                                                                                                                                                                                                           |
|------------------------------|---------------------------------------------------------------------------------------------------------------------------------------------------------------------------------------------------------------------------------------|
| Occupancy                    | Occupancy of ion under consideration                                                                                                                                                                                                  |
| B factor (env.) <sup>1</sup> | Metal ion B factor, with valence-weighted environmental average B factor in parenthesis                                                                                                                                               |
| Ligands                      | Elemental composition of the coordination sphere                                                                                                                                                                                      |
| Valence <sup>2</sup>         | Summation of bond valence values for an ion binding site. <i>Valence</i> accounts for metal-ligand distances                                                                                                                          |
| nVECSUM <sup>3</sup>         | Summation of ligand vectors, weighted by bond valence values and normalized by overall valence. Increase when the coordination sphere is not symmetrical due to incompleteness.                                                       |
| Geometry <sup>1,4</sup>      | Arrangement of ligands around the ion, as defined by the <i>NEIGHBORHOOD</i> algorithm                                                                                                                                                |
| gRMSD(°) <sup>1</sup>        | R.M.S. Deviation of observed geometry angles (L-M-L angles) compared to ideal geometry, in degrees                                                                                                                                    |
| Vacancy <sup>1</sup>         | Percentage of unoccupied sites in the coordination sphere for the given geometry                                                                                                                                                      |
| Bidentate                    | Number of residues that form a bidentate interaction instead of being considered as multiple ligands                                                                                                                                  |
| Alt. metal                   | A list of alternative metal(s) is proposed in descending order of confidency, assuming metal environment is accurately determined. This feature is still experimental. It requires user discrimination and cannot be blindly accepted |

**Extended Data Figure 6: RbCBM74 undergoes minor conformational changes upon ligand binding.** **A.** Overlay of RbCBM74 from Sas6T structure (PDB 7uww) in blue with RbCBM74 from Blg-RbCBM74-Blg co-crystal structure (PDB 7uwv) in deep teal. **B.** Loop from G374-G382 demonstrating that the unliganded loop (blue) occludes W373 but moves to allow access to W373 in the ligand-bound structure (deep teal). **C.** Validation of ion identities with CheckMyMetal [72]. Note Ca<sup>2+</sup>-4 is exchanged for a Na<sup>+</sup> ion in the G10 liganded structure.

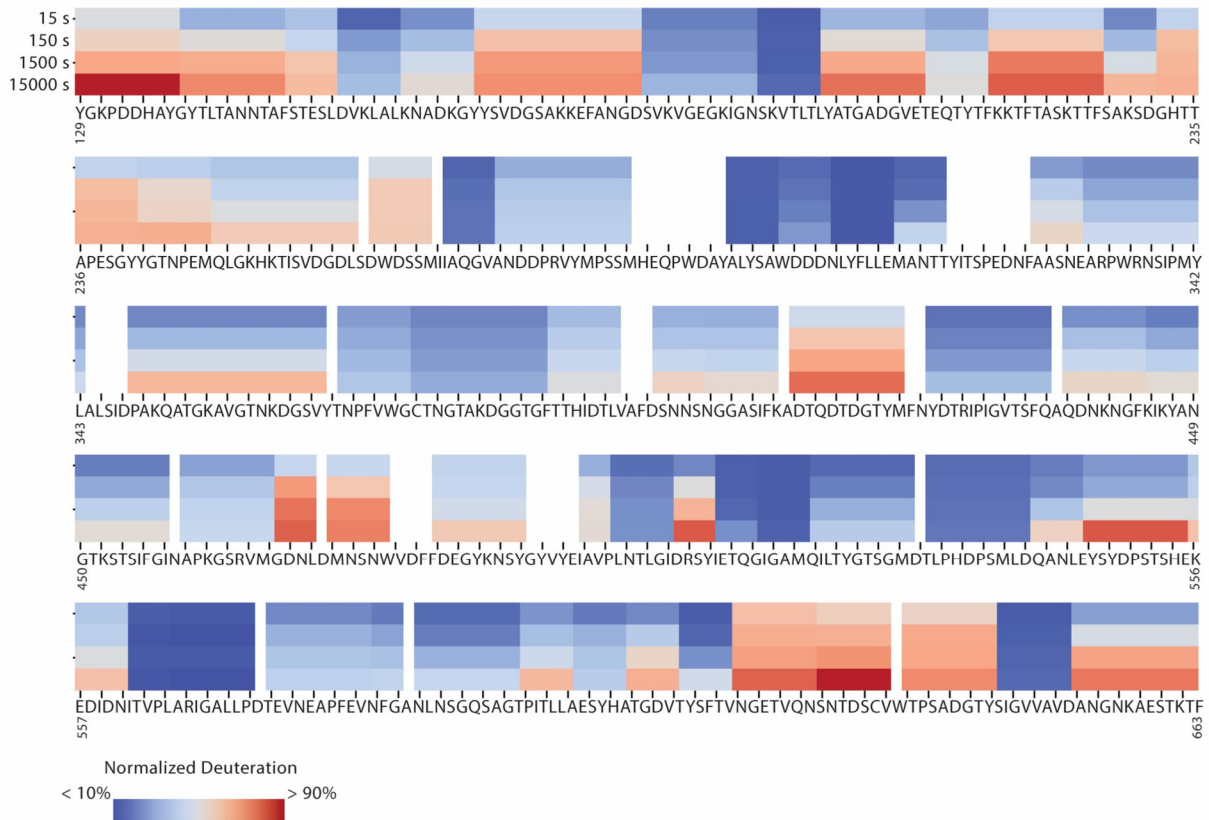

**B**

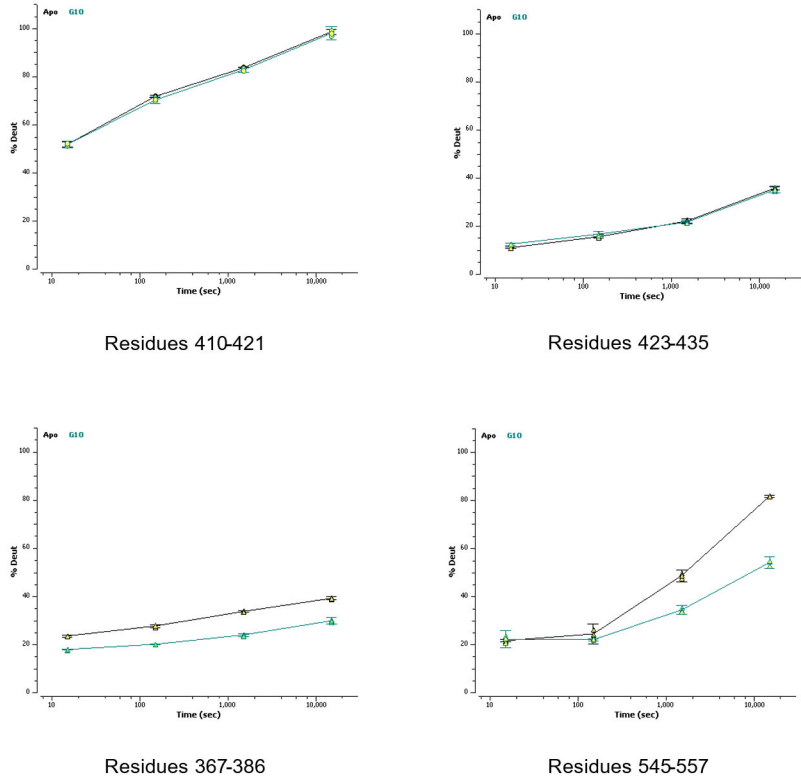

**C**

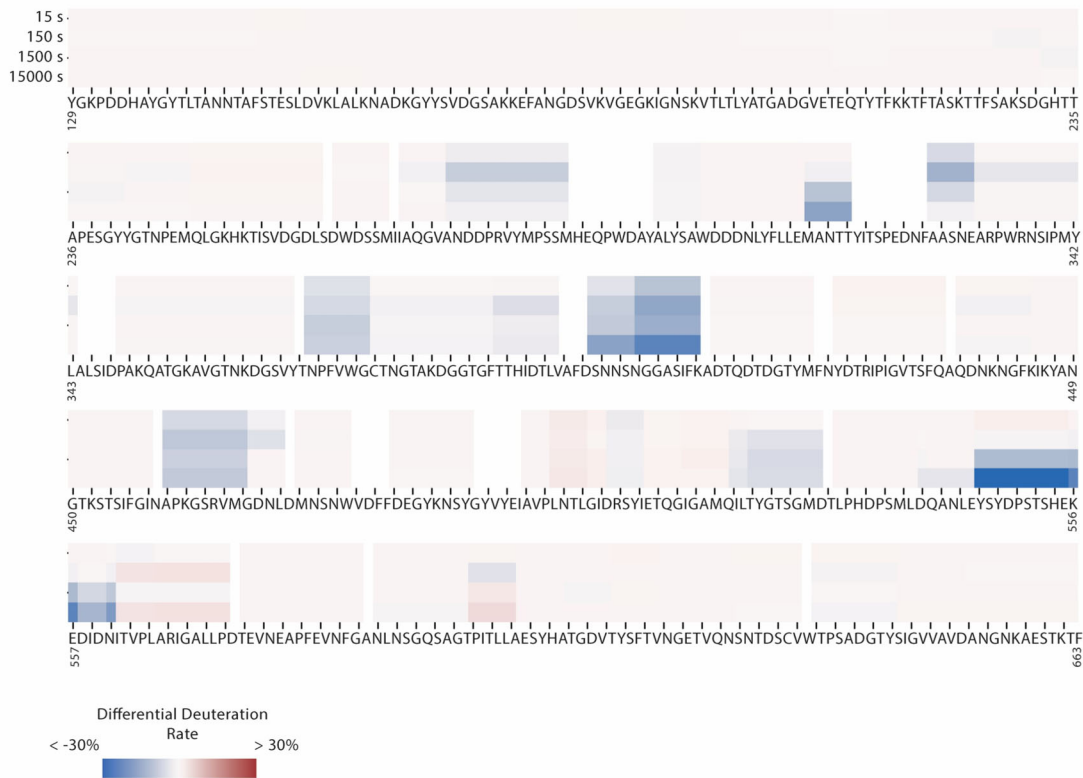



**Extended Data Figure 7: HDX-MS analysis of *RbCBM74* A.** Heatmap of exchange dynamics of Blg-*RbCBM74*-Blg. All values are the average of three replicates. **B.** Representative differential uptake for peptides that both showed no significant difference (upper panels) and those which showed significant differential decreased deuteration (lower panels) in the G10 bound Blg-*RbCBM74*-Blg. Data points are represented by the mean  $\pm$  standard deviation. **C.** Heatmap of the differential exchange dynamics of Blg-*RbCBM74*-Blg in the absence and presence of G10. Blue represents lower exchange (protection) in the G10 bound form and red higher exchange in the G10 bound form. All values are the average of three replicates.

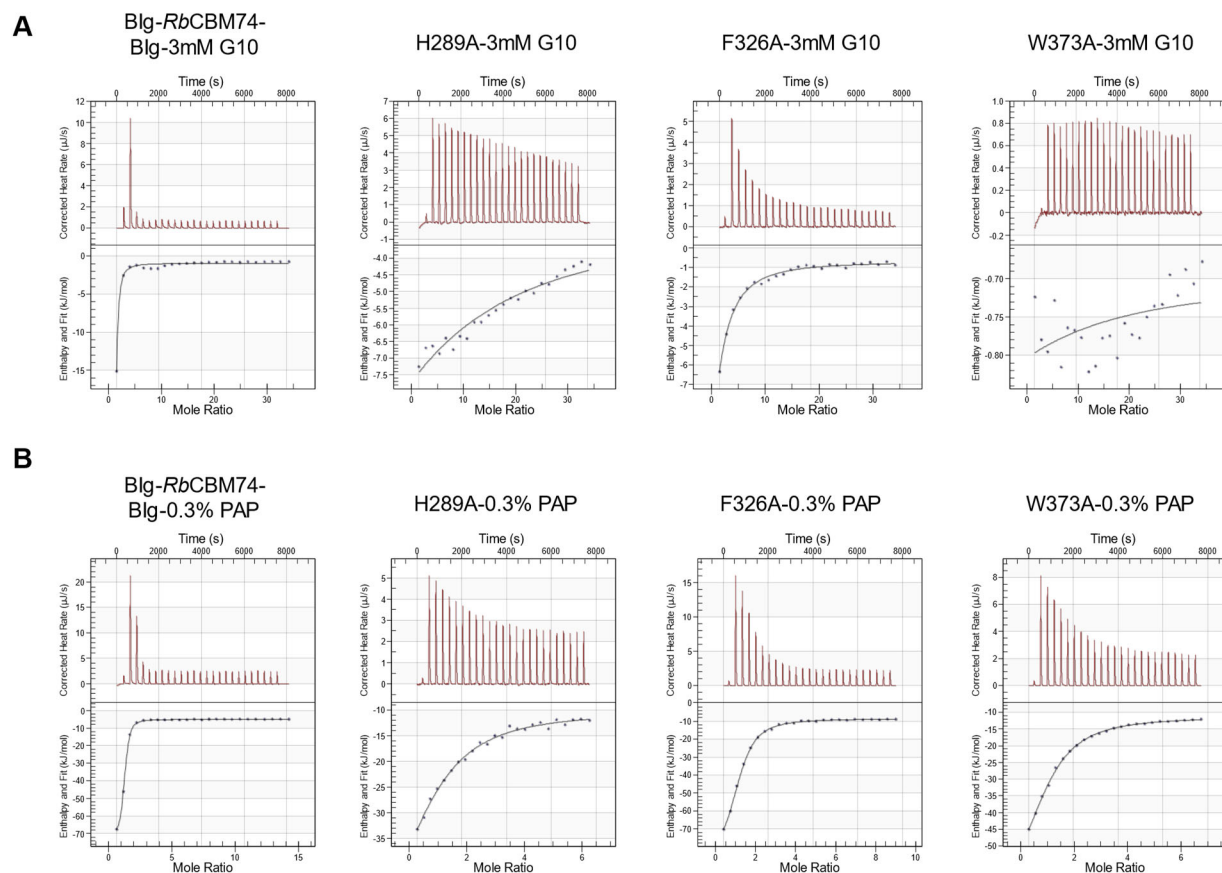

**Extended Data Figure 8: Representative ITC graphs of *RbCBM74* mutations.** Blg-*RbCBM74*-Blg, H289A, F236A, and W373A mutations binding to **A.** maltodecaose (G10), and **B.** potato amylopectin (PAP).

A

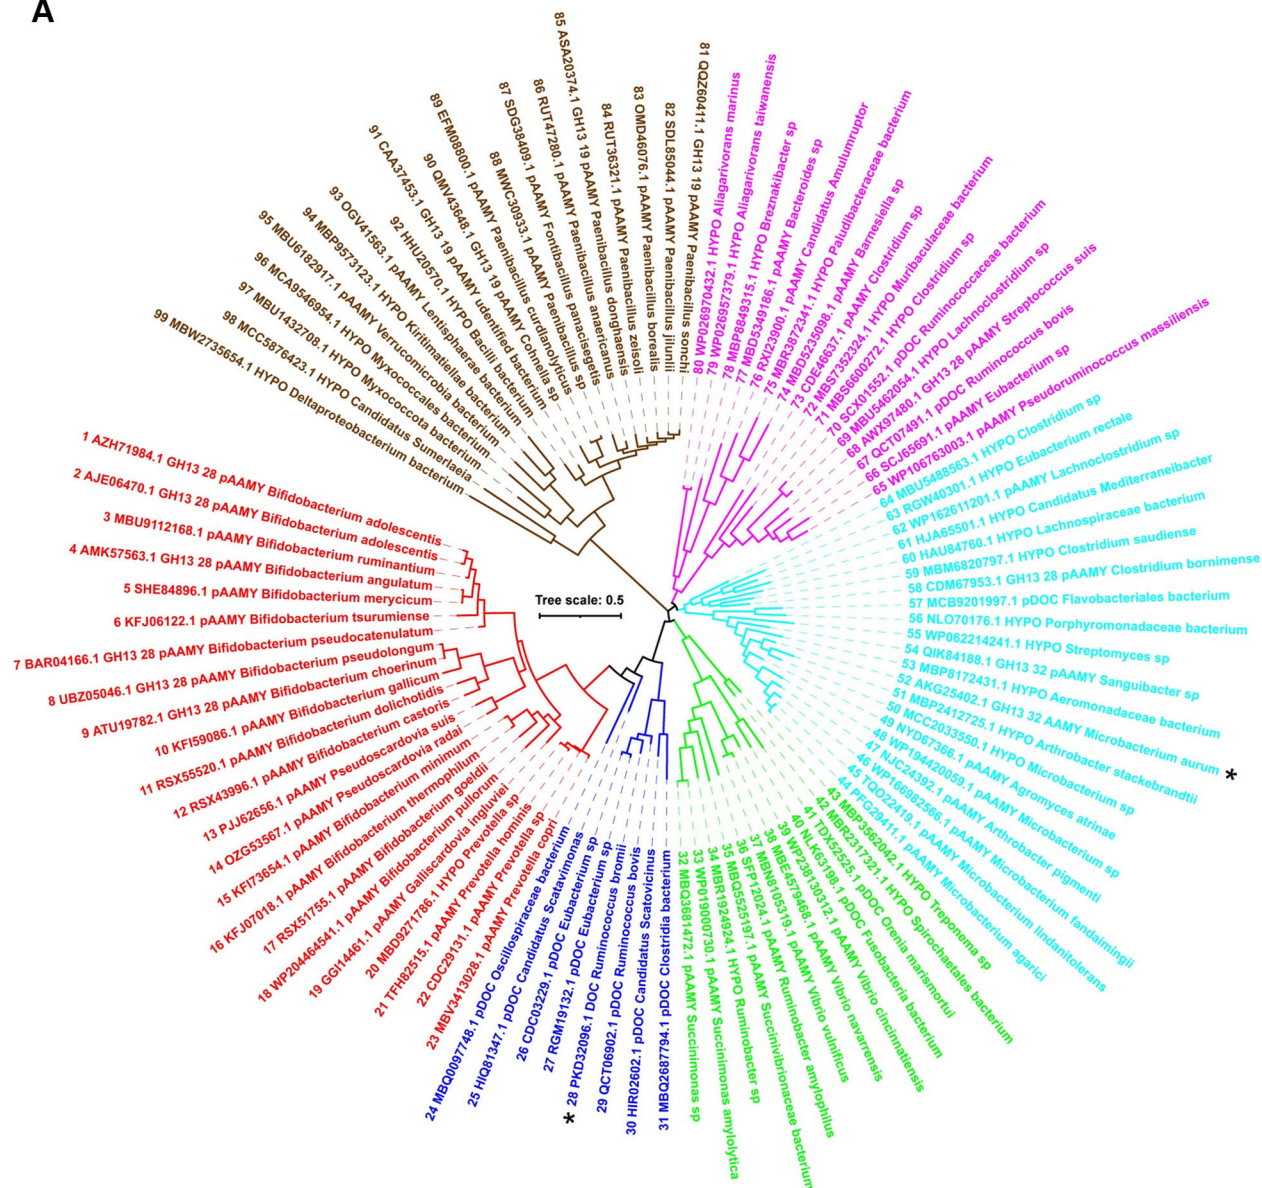



**B**

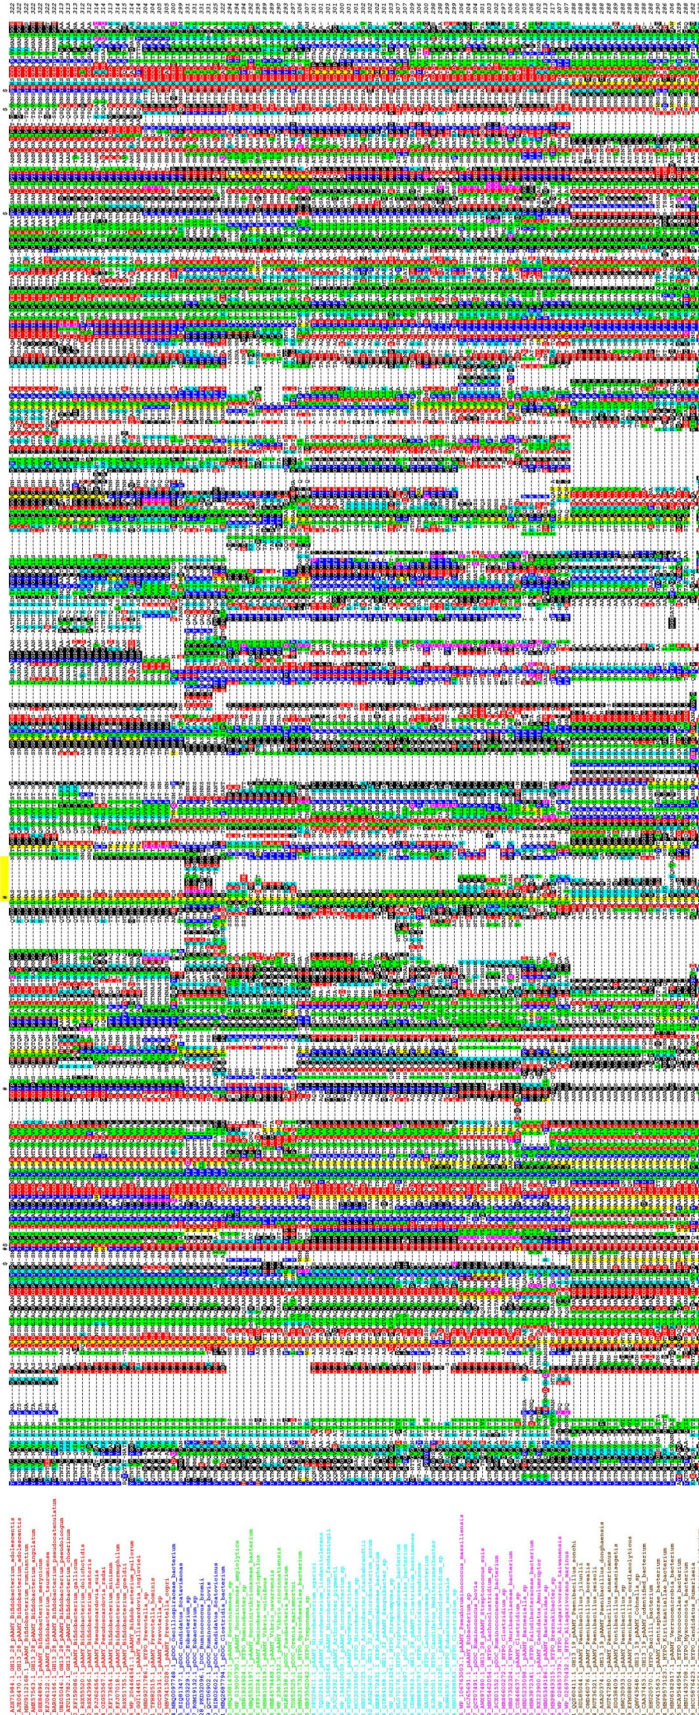

**Extended Data Figure 9: Conservation of binding residues among all 99 CBM74 family members. A.** A maximum-likelihood tree covering 99 sequences with emphasis on the two experimentally characterized CBM74s, Sas6 from *Ruminococcus bromii* (No. 28, blue cluster) and the subfamily GH13\_32  $\alpha$ -amylase from *Microbacterium aurum* (No. 52; cyan cluster). For details concerning all 99 CBM74 sequences, see Extended Data Table 2. A simplified tree showing 33 selected CBM74 sequences representing all clusters is shown in Fig. 6A. **B.** Sequence alignment of the 99 CBM74 sequences. The labels of protein sources consist of the order number (1-99), GenBank accession number, abbreviation of the source protein/enzyme and the name of the organism. The two experimentally characterized CBM74 are marked by an asterisk. The six individual groups distinguished from each other by different colors correspond to six clusters seen in the evolutionary tree (panel A); the sequence order in the alignment (starting from the top from 1 to 99) reflects their order in the tree in the anticlockwise manner (starting from the first sequence in the red cluster). The residues responsible for stacking interactions and involved in hydrogen bonding with glucose moieties of the bound  $\alpha$ -glucan are signified by a hashtag and a dollar sign, respectively, above the alignment. The flexible loop observed in the three-dimensional structure of *Rb*CBM74 is highlighted by the short yellow strip over the alignment. Identical and similar positions are signified by asterisks and dots/semicolons under the alignment blocks. The color code for the selected residues: W, yellow; F, Y – blue; V, L, I – green; D, E – red; R, K – cyan; H – brown; C – magenta; G, P – black.
